1 **Arthropod IGF, Relaxin and Gonadulin, putative**  
2 **orthologs of *Drosophila* insulin-like peptides 6, 7 and**  
3 **8, likely originated from an ancient gene triplication**  
4

5  
6 Jan A. Veenstra<sup>1</sup>,

7

8 <sup>1</sup> INCIA UMR 5287 CNRS, University of Bordeaux, Bordeaux, Pessac, France

9

10 Corresponding Author:

11 Jan A. Veenstra<sup>1</sup>

12 INCIA UMR 5287 CNRS, Université de Bordeaux, allée Geoffroy St Hillaire, CS 50023, 33 615

13 Pessac Cedex, France

14 Email address: jan-adrianus.veenstra@u-bordeaux.fr

15

16 **Abstract**

17 **Background.** Insects have several genes coding for insulin-like peptides and they have been  
18 particularly well studied in *Drosophila*. Some of these hormones function as growth hormones  
19 and are produced by the fat body and the brain. These act through a typical insulin receptor  
20 tyrosine kinase. Two other *Drosophila* insulin-like hormones are either known or suspected to act  
21 through a G-protein coupled receptor. Although insulin-related peptides are known from other  
22 insect species, *Drosophila* insulin-like peptide 8, one that uses a G-protein coupled receptor, has  
23 so far only been identified from *Drosophila* and other flies. However, its receptor is widespread  
24 within arthropods and hence it should have orthologs. Such putative orthologs were recently  
25 identified in decapods and have been called gonadulins.

26 **Methodology.** In an effort to identify gonadulins in other arthropods public genome assemblies  
27 and short-read archives from insects and other arthropods were explored for the presence of  
28 genes and transcripts coding insulin-like peptides and their putative receptors.

29 **Results.** Gonadulins were detected in a number of arthropods. In those species for which  
30 transcriptome data from the gonads is available insect gonadulin genes are expressed in the  
31 ovaries and at least in some species also in the testes. In some insects differences in gonadulin  
32 expression in the ovary between actively reproducing and non-reproducing females differs more  
33 than 100-fold. Putative orthologs of *Drosophila* ilp 6 were also identified. In several non-  
34 Dipteran insects these peptides have C-terminally extensions that are alternatively spliced. The  
35 predicted peptides have been called arthropod insulin-like growth factors. In cockroaches,  
36 termites and stick insects genes coding for the arthropod insulin-like growth factors, gonadulin  
37 and relaxin, a third insulin-like peptide, are encoded by genes that are next to one another

38 suggesting that they are the result of a local gene triplication. Such a close chromosomal  
39 association was also found for the arthropod insulin-like growth factor and gonadulin genes in  
40 spiders. Phylogenetic tree analysis of the typical insulin receptor tyrosine kinases from insects,  
41 decapods and chelicerates shows that the insulin signaling pathway evolved differently in these  
42 three groups. The G-protein coupled receptors that are related to the *Drosophila* ilp 8 receptor  
43 similarly show significant differences between those groups.  
44 **Conclusion.** A local gene triplication in an early ancestor likely yielded three genes coding  
45 gonadulin, arthropod insulin-like growth factor and relaxin. Orthologs of these genes are now  
46 commonly present in arthropods and almost certainly include the *Drosophila* insulin-like peptides  
47 6, 7 and 8.

48

## 49 **Introduction**

50

51 Insulin may well be the best studied and perhaps the best known hormone, due to its essential  
52 role in the regulation of glucose homeostasis and its effective and widespread use to treat  
53 diabetes. Insulin is related to a number of other hormones with different functions, such as  
54 insulin-like growth factors, relaxin and Ins3-5. One of the interesting aspects of these hormones  
55 is their use of two structurally very different receptors, receptor tyrosine kinases (RTKs) and  
56 leucine-rich repeat G-protein coupled receptors (LGRs). Thus, whereas insulin and insulin-like  
57 growth factors (IGFs) act through an RTK, relaxin and Ins3 use an LGR for signal transduction.  
58 An intriguing question remains as to how this switch was made from one type of receptor to  
59 another, or alternatively whether the ancestral insulin used perhaps both types of receptors and  
60 during evolution its descendants became specific ligands for only one of the two receptors.  
61 Like other hormones and neuropeptides, insulin was already present in the ancestral bilaterian  
62 that gave rise to both protostomes and deuterostomes. The first indication that an insulin-like  
63 peptide (ilp) might exist in protostomes was the observation that insulin enhances cell  
64 differentiation in cultured *Drosophila* cells (Seecof & Dewhurst, 1974). The identification of one  
65 ilp in the silkworm *Bombyx mori* that can break diapause (Nagasawa et al., 1984, 1986) and  
66 another one in neuroendocrine cells known to produce a growth hormone in the pond snail  
67 *Lymnaea stagnalis* (Smit et al., 1988) reinforced the hypothesis that insulin may function as  
68 growth hormones in protostomes. Since then a large variety of invertebrates has yielded a still  
69 larger variety of ilps (e.g. Murphy & Hu, 2013; Mizoguchi & Okamoto, 2013; Nässel & Vanden  
70 Broeck, 2016; Yu, Han & Liu, 2020).

71 In insects the ilps of *Drosophila* and the silkworm *Bombyx mori* have been extensively studied  
72 and these hormones are best known in fruit fly due to the genetic power that can be employed in  
73 this species. There are eight ilp genes in *Drosophila melanogaster*, which are referred to as  
74 *Drosophila* ilps 1-8. *Drosophila* ilps 1, 2, 3 and 5 are co-expressed in a single cell type of  
75 neuroendocrine cells of the brain (Brogiolo et al., 2001; Grönke et al., 2010). Of these ilp 2 seems  
76 to be the most important and it also seems to be expressed exclusively or predominantly in these  
77 brain neuroendocrine cells. *Drosophila* ilps 3 and 5 are also expressed in other tissues, *e.g.* ilp 3  
78 is expressed in midgut muscle of both larvae and adults where its expression stimulates midgut  
79 growth in response to feeding (O'Brien et al., 2011). *Drosophila* ilp 1 has been shown to be  
80 expressed in the brain neuroendocrine cells, but its expression is largely limited to stages when  
81 the animal does not feed, *i.e.* metamorphosis and diapause (Liu et al., 2016). The expression of  
82 dilp 4 seems limited to the embryonic stage, while ilp 6 is expressed predominantly if not  
83 exclusively by the fat body (Slaidina et al., 2009; Okamoto et al., 2009b). All these ilps are  
84 believed to activate the single *Drosophila* insulin RTK, while *Drosophila* ilps 7 and 8 are either  
85 known (ilp 8) or suspected (ilp 7) to activate *Drosophila* LGRs 3 and 4 respectively (Vallejo et  
86 al., 2015; Gontijo & Garelli, 2018; Veenstra et al., 2012). *Drosophila* ilp 7 is expressed by  
87 neurons in the abdominal neuromeres in a sex specific manner (Miguel-Aliaga, Thor & Gould,  
88 2008; Yang et al., 2008; Castellanos, Tang & Allan, 2013), while ilp 8 is expressed by the  
89 imaginal disks as well as the ovary and testes as shown by flyatlas (Gontijo & Garelli, 2018; Liao  
90 & Nässel, 2020).

91 The primary amino acid sequences of the *Drosophila* ilps vary considerably and this is also the  
92 case in other arthropod species that have multiple genes coding insulin-related peptides. There is  
93 not only large sequence variability within a species, but also between species. Only when species  
94 are relatively closely related is it possible to reliably identify orthologous genes in different  
95 species. However, while in most insects the A- and B-chains have thus quite variable amino acid  
96 sequences, this not the case for orthologs of *Drosophila* ilp 7. The strong conservation of the  
97 primary amino acid sequence of these peptides allows for easy identification of its orthologs, not  
98 only in other insect species, but also in other protostomes like various mollusks and even in some  
99 deuterostomes (Veenstra et al., 2012). The strongly conserved primary amino acid sequence of  
100 these peptides suggests that it interacts with another receptor than the other ilps, perhaps in  
101 addition to the RTK. As some ilps act through a G-protein coupled receptor (GPCR), it seemed a  
102 distinct possibility that *Drosophila* ilp 7 and their orthologs might also stimulate a GPCR.

103 Interestingly, genes coding LGR4 and its orthologs are present in the same genomes as those that

104 have genes coding orthologs of *Drosophila* ilp 7. This holds not only for insects, but also other  
105 arthropods, mollusks and even some basal deuterostomes. Every genome that has a *Drosophila*  
106 ilp 7 ortholog also has a LGR4 ortholog and *vice versa* (Veenstra et al., 2012; Veenstra, 2014,  
107 2019). Furthermore, LGR3 and LGR4 are holomologs of vertebrate LGRs that use ilps as ligands.  
108 This means that the ligands for the LGR4s must be the *Drosophila* ilp 7 orthologs. Since these  
109 peptides are so different from the typical insect neuroendocrine insulins, it made sense to give it a  
110 different name. Earlier work on *Drosophila* suggested that it might have a role similar to relaxin  
111 in vertebrates (Yang et al., 2008) and since LGR4 is an ortholog of the relaxin receptor (Veenstra,  
112 2014), has also been called relaxin, but it might be better to call them arthropod or invertebrate  
113 relaxin.

114 *Drosophila* ilp 8 is another ilp (for review see Gontijo & Garelli, 2018) that acts through a  
115 leucine-rich repeat GPCR, LGR3 (Garelli et al., 2015; Vallejo et al., 2015; Colombani et al.,  
116 2015). However, whereas *Drosophila* ilp 7 orthologs have well conserved primary amino acid  
117 sequences, this is not the case for *Drosophila* ilp 8. Indeed, if it were not for the common  
118 presence of LGR3 orthologs in insect and other arthropod genomes one might believe that this  
119 peptide hormone evolved within the higher flies and is absent from other insects. The imaginal  
120 disks in *Drosophila* produce and release ilp 8 as long as they develop and also when they get  
121 damaged. When it is no longer released this is used by the brain as a signal to initiate  
122 metamorphosis (Garelli et al., 2012; Colombani, Andersen & Léopold, 2012; Jaszczak et al.,  
123 2016). *Drosophila* ilp 8 is furthermore produced by the testes and ovaries (Liao & Nässel, 2020)  
124 and since imaginal disks are only present in holometabolous insects, it is tempting to speculate  
125 that the gonads are the original site of expression of orthologs of this peptide. I had previously  
126 suggested that the crustacean androgenic insulin-like peptide that stimulates premature sexual  
127 maturation in male crustaceans and can induce sex reversal in females, might be an ortholog of  
128 *Drosophila* ilp 8 (Veenstra, 2016b). However, more recently a fourth type of ilp was identified in  
129 two decapod species, that seem to be structurally more similar to *Drosophila* ilp 8 than the  
130 androgenic insulin-like peptides (Chandler et al., 2017). It has now been shown that these  
131 peptides, which have been called gonadulins, are generally present in decapods and commonly  
132 expressed by the gonads (Veenstra, 2020). Since gonadulins might be orthologs of *Drosophila* ilp  
133 8 (Veenstra, 2020), it seemed worthwhile to look for this hormone in other arthropods. Analysis  
134 of arthropod genome and transcriptome sequences revealed that such peptides are not limited to  
135 decapods but are also present in insects as well as chelicerates.

136 During this analysis interesting new details of the putative orthologs of *Drosophila* ilp 6 were  
137 also encountered as well as evidence suggesting that the putative orthologs of *Drosophila* ilps 6,  
138 7 and 8 arose from an ancestral gene triplication.

139

## 140 **Materials & Methods**

141

142 The sratoolkit (<https://trace.ncbi.nlm.nih.gov/Traces/sra/sra.cgi?view=software>) in combination  
143 with Trinity (Grabherr et al., 2011) was used in the search for transcripts encoding peptides that  
144 might be somewhat similar to insulin in insect gonad transcriptome short read archives (SRAs).  
145 The method consisted of using the tblastn\_vdb command from the sratoolkit to recover individual  
146 reads from transcriptome SRAs that show possible sequence homology with insulin-like  
147 molecules. Since insulin-like peptides have highly variable sequences the command is run with  
148 the -seg no and -evaluate 100 options. Reads that are identified are then collected using the vdb-  
149 dump command from the sratoolkit. The total number of reads recovered is much smaller than  
150 those typically present in an SRA and this allows one to use Trinity on a normal desktop  
151 computer to make a mini-transcriptome of those reads. This transcriptome is then searched using  
152 the BLAST+ program (<ftp://ftp.ncbi.nlm.nih.gov/blast/executables/blast+/>) for possible insulin  
153 transcripts. This first round usually yields numerous false positives and perhaps a few partial  
154 transcripts that look interesting. These promising but partial transcripts are then used as query  
155 using the blastn\_vdb command from the sratoolkit on the same SRAs and reads are collected  
156 anew and Trinity is used to make another transcriptome that is again queried for the presence of  
157 insulin-like transcripts. In order to obtain complete transcript the blastn\_vdb search may need to  
158 be repeated several times. Alternatively genes coding such transcripts were identified in genome  
159 assemblies using the BLAST+ program and Artemis (Rutherford et al., 2000). Once such  
160 transcripts had been found, it was often possible to find orthologs from related species. For  
161 example, once the honeybee gonadulin was found, it was much easier to find it in other  
162 Hymenoptera. The same methods were used to identify relaxin and C-terminally extended ilps,  
163 which have much better conserved primary amino acid sequences and consequently are more  
164 easily identified, as well as their putative receptors. Whenever possible all sequences were  
165 confirmed in both genome assemblies and in transcriptome SRAs. In many cases transcripts for  
166 the various ilps and receptors were already present in genbank, although they were not always  
167 correctly identified. All these sequences are listed in Suppl. Spreadsheet 1.

168 Expression was estimated by counting how many RNAseq reads in each SRA contained coding  
169 sequence for each of the genes. In order to avoid untranslated sequences of the complete  
170 transcripts, that sometimes share homologous stretches with transcripts from other genes and can  
171 cause false positives, only the coding sequences were used as query in the blastn\_vdb command  
172 from the sratoolkit. This yielded the blue numbers in Suppl. Spreadsheet 2. In order to more  
173 easily compare the different SRAs these numbers were then expressed as per million spots in  
174 each particular SRA. These are the bold black numbers in Suppl. Spreadsheet 2.  
175 For the expression of alternative aIGF (arthropod insulin-like growth factor) splice forms reads  
176 for each splice variant were first separately identified. Unique identifiers in these two sets were  
177 determined to obtain the total number of reads for aIGF. Those identifiers that were present in the  
178 initial counts for both splice forms were counted separately and subtracted from the initial counts  
179 of the two splice variants to obtain the number of reads specific for each isoform.  
180 The various SRAs that were used are listed in the supplementary pdf file and were downloaded  
181 from <https://www.ncbi.nlm.nih.gov/sra/>. The following genome assemblies were also analyzed:  
182 *Aedes aegypti* (Matthews et al., 2018), *Blattella germanica* (Harrison et al., 2018), *Bombyx mori*  
183 (Kawamoto et al., 2019), *Galleria melonella* (Lange et al., 2018), *Glossina morsitans* (Attardo et  
184 al., 2019), *Hermetia illucens* (Zhan et al., 2020), *Latrodectus hesperus* (unpublished),  
185 *Mesobuthus martensii* (Cao et al., 2013), *Oncopeltus fasciatus* (Panfilio et al., 2019),  
186 *Parasteatoda tepidariorum* (Schwager et al., 2017), *Pardosa pseudoannulata* (Yu et al., 2019),  
187 *Periplaneta americana* (Li et al., 2018), *Stegodyphus dumicola* (Liu et al., 2019), *Tetranychus*  
188 *urticae* (Grbić et al., 2011), *Timema cristinae* (Riesch et al., 2017), *Tribolium castaneum*  
189 (Herndon et al., 2020) and *Zootermopsis nevadensis* (Terrapon et al., 2014). All genomes were  
190 downloaded from <https://www.ncbi.nlm.nih.gov/genome/>.

191

## 192 **Phylogenetic and sequence similarity trees**

193 For the phylogenetic tree of the insulin RTKs sequences were aligned with clustal omega  
194 (Sievers et al., 2011). Using Seaview (Gouy, Guindon & Gascuel, 2010) only well aligned  
195 sequences were retained and saved as a fasta file. Fasttree2 (Price et al., 2010) was then used to  
196 produce a phylogenetic tree using the ./FastTreeDbl command with the following options: -spr 4 -  
197 mlacc 2 -slownni. The phylogenetic GPCR tree was constructed in the same way using only the  
198 transmembrane regions.

199 The amino acid sequences of arthropod ilps are not well conserved and hence one can not make  
200 phylogenetic trees, as it is impossible to know which amino acid residues can be reliably aligned  
201 apart from the cysteines. Even the latter can cause problems when the spacing between is not the  
202 same in different peptides. To compare the different ilps an unbiased method is needed. For this  
203 clustal omega was used to align the complete precursor sequences and even though visual  
204 inspection with Seaview reveals very poor alignments, the alignment was not changed but saved  
205 as a fasta file and Fasttree was used with the same parameters as above to construct trees.  
206 Although such trees are not phylogenetic trees they do allow for an unbiased comparison of the  
207 various sequences. The trees so produced have been called sequence similarity trees. Note that  
208 the branch probabilities of such trees give useful information as to how reliable the grouping of  
209 the various ilp precursors is.  
210

## 211 **Prediction of prepropeptides processing**

212 Signal peptides were predicted using signal P-5.0 (Almagro Armenteros et al., 2019). No  
213 attempts were made to predict convertase cleavage sites in the gonadulin and IGF precursors.  
214 Both of these putative hormones are likely not made by neuroendocrine cells. This implies that  
215 these hormones may not be exposed to neuroendocrine convertases and hence rules that describe  
216 how these convertases might cleave would not be applicable.  
217

## 218 **Results**

### 219 **Gonadulin-like peptides are present in many arthropods**

220 Peptides that share the typical location of six cysteine residues with insulin but are insufficiently  
221 similar to known insect ilps to be easily recognized as such, were identified in a large number of  
222 arthropods. Their sequences differ not only from other ilps, but are also very variable between  
223 them. As a consequence they are difficult to find in genome assemblies, unless a sequence from a  
224 not too distantly related species is available. This explains why searches were most successful  
225 when done in ovary and/or testes transcriptomes. Putative gonadulin orthologs were identified not  
226 only in insects, but also in several chelicerates, notably spiders, a spider mite and scorpions. A  
227 list of gonadulin propeptides in representative species is given in Figure 1 and additional  
228 sequences are provided in Suppl. Spreadsheet 1. It is evident that although these peptides have  
229 been given the same name, their sequences diverge even more than the neuroendocrine arthropod

230 insulins. When constructing a sequence similarity tree from the insect ilps the gonadulins are well  
231 separated from the relaxins and the other insect ilps. Interestingly even the insulins and aIGFs are  
232 reasonably well separated, except for the precursors from highly evolved flies (*Drosophila* and  
233 *Glossina*) and the head louse (Fig. 2). When this is repeated on sequences from a set of arthropod  
234 ilps, the gonadulins are once again well separated from the other insulin related peptides (Fig. 3,  
235 Fig. S1).

236 Publicly available transcriptomes were used to explore in which tissues they are expressed. By  
237 nature such data is imperfect, as these transcriptomes were not made to answer the question  
238 where gonadulin, other insulin-related peptides or their putative receptors are expressed and  
239 hence such data is limited. Some of the more salient examples are illustrated in Table 1. In  
240 honeybees the ovaries of virgin queens do not express significant amounts of gonadulin, but those  
241 of egg-laying queens produce it in large quantities. In a single queen bumblebee larva  
242 transcriptome the gonadulin reads are at least 15 times more numerous than those in the three  
243 transcriptomes each for male and worker larvae (Suppl. Spreadsheet 2). In the tsetse fly *Glossina*  
244 *morsitans* the gene is strongly expressed in ovaries of non-pregnant females, *i.e.* those that  
245 mature an egg, and hardly at all in pregnant/lactating females when egg maturation is arrested. In  
246 the bugs *Rhodnius prolixus* and *Oncopeltus fasciatus* the ovaries also express this gene, as do  
247 ovaries and testes of the stick insect *Timema cristinae*, while short read archives of unfecundated  
248 eggs from *Blattella germanica* similarly contain large amounts of gonadulin reads. In the termite  
249 *Zootermopsis nevadensis*, gonadulin reads are abundant in reproducing females but rare or absent  
250 in alate females or reproducing males. The gene is also expressed in the testis of the American  
251 cockroach and possibly in the ovary as well, since it can be detected in whole body  
252 transcriptomes from females (Suppl. Spreadsheet 2). However, as in decapods (Veenstra, 2020),  
253 in insects gonadulin expression is not limited to the gonads (Table 1; Suppl. Spreadsheet 2). In  
254 the spider *Parasteatoda tepidariorum* ovary expression of gonadulin varied significantly between  
255 different samples (Table 1), and even larger variability in gonadulin expression has previously  
256 been reported for the crab *Portunus trituberculatus* (Veenstra, 2020). This shows that data from a  
257 single SRA are not necessarily informative as to the level of gonadulin expression in this organ.  
258 Interestingly, in some spider transcriptomes gonadulin expression is also observed in silk glands  
259 (Table1, Suppl. Spreadsheet 2).

260



## 261 **Arthropod insulin-like growth factors**

262 Most insect ilps contain only a few amino acid residues after the sixth cysteine residue in the  
263 precursor and sometimes there are none, however some ilps have a long C-terminal extension.  
264 Such ilps are commonly present in hemimetabolous insects as well as several holometabolous  
265 species (Fig. 4, Fig. S2 , Suppl. Spreadsheet 1). In some species the C-terminal extension of these  
266 peptides are easily missed since if one ignores an intron donor site in the genome sequence the  
267 conceptual translation of such sequences predicts much smaller ilps that look similar to the well  
268 known *Drosophila* peptides. Nevertheless, analysis of RNAseq SRAs from several species shows  
269 that such intron donor sites are functional. These C-terminal extensions are coded by two  
270 additional exons that are not present in the typical insect neuroendocrine insulin genes. These  
271 extensions are not only commonly present, but also look similar to one another, providing further  
272 evidence that they are genuine parts of these ilps (Fig. 4). Furthermore, Trinity analysis of SRAs  
273 containing reads for such transcripts reveals that they are alternatively spliced which leads to the  
274 production of precursors with different C-terminal extensions. The difference often consists of  
275 the inclusion or exclusion of a sequence rich in dibasic amino acid residues, mostly arginines,  
276 that in many species has two characteristic cysteine residues. The alternative splice site is in the  
277 middle in of what is usually the third coding exon, the last coding exon of these genes is less well  
278 conserved but contains a sequence that conforms more or less to the GTVX<sub>1</sub>PX<sub>2</sub>(F/Y) consensus  
279 sequence. Such genes are present in species as diverse as cockroaches, termites, stick insects,  
280 beetles, bees, ants and moths (Fig. 5). Interestingly, in the stick insect *Timema cristinae* this gene  
281 underwent a local gene duplication, with one gene coding a peptide with the arginine-rich peptide  
282 sequence and the second one lacking it.

283 In hemiptera ilp genes exist that similarly code for C-terminally extended ilps that are  
284 alternatively spliced, but in those species the extended C-terminals of the predicted peptides are  
285 not as well conserved (Fig. S3). Other C-terminally extended ilps were found in spiders and  
286 scorpions, but in those species no evidence was found for alternative splicing. Such C-terminally  
287 extended ilps appear absent from decapods (Veenstra, 2020).

288 The term insulin-like growth factors was initially used as a description of substances in plasma  
289 that had insulin-like biological activity, but it is now mostly used as a name for the vertebrate  
290 hormones that are predominantly made in the liver. The use of the same term for both a group of  
291 molecules that have similar characteristics as well two specific hormones is confusing. This is  
292 particularly the case for insects, since hormones that have been called insulin-like growth factors

293 are not necessarily orthologs of one another nor of these vertebrate hormones. One of the two  
294 types of insect insulin-like growth factors, *Bombyx* IGF-like peptide (BIGFLP; Okamoto et al.,  
295 2009a), has only been found in *Bombyx mori*, although it can be expected to be present in other  
296 Lepidoptera as well. The insulin-like growth factor described above from several insect species  
297 seems to be commonly present in arthropods, including *Bombyx mori* and I propose to call it  
298 arthropod insulin-like growth factor (aIGF).  
299 The data from an extended set of *Bombyx* transcriptome SRAs shows that in this species both  
300 insulin-like growth factors are expressed by the fat body, but the temporal patterns of expression  
301 of the two differ. Thus, aIGF is also expressed in larvae, when there is very little expression of  
302 BIGFLP while during the pupal stage their peaks of expression do not coincide (Fig. 6).  
303 Alternative splicing of aIGF mRNA in the silkworm and the honey bee is variable between the  
304 different samples (Fig. 7, Fig S4). In *Bombyx* SRAs from adults show a relatively higher  
305 expression of the longer isoform that has the additional sequence rich in dibasic amino acid  
306 residues (Fig. S5), while in the honeybee those are more common in SRAs from the bodies of  
307 larvae destined to become queens as well as in samples from the Nasonov glands from nurse bees  
308 and in the only available sample of queen heads (Fig. S4). In most species there are insufficient  
309 data or a single isoform may be predominantly expressed such as in the bumblebee (Suppl.  
310 Spreadsheet 2).  
311

### 312 **Is *Drosophila* ilp 6 an aIGF ortholog ?**

313 Given the absence of prominent sequence similarity between *Drosophila* ilp 6 and the aIGFs  
314 from more basal insect species, the obvious question is whether or not *Drosophila* ilp 6 is an  
315 ortholog of aIGF or whether it arose independently. The archetype aIGF gene contains four  
316 coding exons, the first two of which code for the insulin structure. The third consists of two parts,  
317 the first half which is present in both isoforms and the last part of this exon which is alternatively  
318 sliced. The fourth and last coding exon contains the GTVX<sub>1</sub>PX<sub>2</sub>(F/Y) consensus sequence.  
319 During evolution, this basic pattern has been modified on several occasions. In *Oncopeltus* and  
320 other hemiptera the third coding exon was modified, while in both the mosquito *Aedes aegypti*  
321 and the honeybee, the intron between the first two coding exons was eliminated. In *Aedes* other  
322 changes occurred as well, but the gene can still be recognized as an aIGF gene by the presence of  
323 an exon that shows sequence similarity to the fourth coding exon of the aIGF genes. Soldier flies

324 and robber flies have aIGF genes that are complete except for the third coding exons. It thus  
325 seems that the third coding exon was lost when Diptera evolved (Fig. 8). However, whereas the  
326 aIGF genes in those flies can still be recognized as such by the presence of what once was the  
327 fourth coding exon of a classical aIGF gene, this exon is not only absent from *Drosophila*, but is  
328 missing from all Eremoneura (Fig. 8). There are two possible explanations for this absence, either  
329 this exon was also lost, or the entire aIGF gene was lost and a novel insulin-like growth factor-  
330 like gene evolved in those flies, perhaps not unlike the origin of BIGFLP in *Bombyx*. The amino  
331 acid sequences of the aIGFs from the most highly developed non-Eremoneura flies are very  
332 similar to those from the least evolved Eremoneura flies (Fig. S6). So the aIGF gene persisted but  
333 it lost the last coding exon reminiscent of a classical aIGF gene and the only physico-chemical  
334 characteristic that separates aIGF from the neuroendocrine insulins is the very short sequence  
335 connecting the putative A- and B-chains.

336

### 337 **Arthropod relaxins**

338 The arthropod relaxins are known from a large number of arthropods, although they are lacking  
339 in many insect species. As noted previously they have by far the best conserved amino acid  
340 sequences in both the A- and B-chains of all the protostomian ilps and paralogs of this particular  
341 peptide are also found in other protostomians and even some basal deuterostomes. Neuropeptides  
342 containing cysteine residues typically have them in pairs, since as soon a cysteine containing  
343 peptide enters the endoplasmatic reticulum these residues get oxidized and form disulfide  
344 bridges. For this reason it is very surprising to see a decapod relaxin having seven cysteine  
345 residues (Fig. 9). The presence of this particular cysteine is unlikely to be an artifact as it is found  
346 in relaxins from a number of decapod species from different orders (Fig. S7). Although most  
347 arthropods appear to have a single relaxin gene, two scorpion genomes have two such genes; in  
348 both cases the predicted amino acid sequence of one of the relaxins seems less conserved  
349 (Veenstra, 2016a).

### 350 **Gonadulin, relaxin and aIGF likely evolved from a local gene triplication**

351 The very large primary amino acid sequence variability of arthropod ilps makes it difficult to  
352 establish their phylogenetic affinities. Sequence similarity trees show that the gonadulins  
353 resemble one another and hence may share a common ancestor, but such trees do not provide

354 details. Synteny offers another means to establish evolutionary relationships and, as chance has it,  
355 the genomes of some species suggests that aIGF, gonadulin and arthropod relaxin originated from  
356 an ancient gene triplication. Thus the three genes coding gonadulin, aIGF and relaxin are located  
357 next to one another in the genomes of the German cockroach and the termite *Zootermopsis*  
358 *nevadensis*. In the stick insect *Timema cristinae* the aIGF underwent a local duplication (see  
359 above) and the four genes coding the two aIGFs, gonadulin and relaxin, are also next to one  
360 another. Furthermore, in the genomes from the spiders *Parasteatoda tepidariorum* and *Pardosa*  
361 *pseudoannulata* the gonadulin genes are next to an aIGF gene, which in these spiders has  
362 undergone one or more local duplications (Fig. 10). Such a close genomic association of these  
363 genes strongly suggests that they arose from a local gene triplication.

### 364 **Receptors**

365 Two different types of receptors are used by ilps, LGRs and RTKs. Insects have two different  
366 types of insulin RTKs, that have been labeled A and B. Most species have one gene coding an  
367 type A and one gene coding for an B type B RTK. However, cockroaches, termites and at least  
368 some stick insects have two B type RTKs and the American cockroach has also two type A  
369 RTKs. The genome assembly of the American cockroach shows that the two type A RTKs  
370 originated from a local gene duplication, as did the two type B RTKs. In Lepidoptera and Diptera  
371 all insulin RTKs are type A and there is no type B RTK. However, Lepidoptera do have a second  
372 gene coding for a protein with clear structural similarity to insulin RTKs, but these proteins lack  
373 the tyrosine kinase domain. I have called those proteins Insulin RTK-like (IRTKL). This gene is  
374 more similar to the type B RTKs than type A and it may have evolved from those RTKs. The  
375 presence of an IRTKL coding gene in at least two genomes from Trichoptera, suggests that it  
376 may have evolved before the two groups diverged. Interestingly, the genome of the beetle  
377 *Tribolium castaneum* has genes for both a type A and a type B RTK, as well as for an IRTKL. No  
378 IRTKL orthologs was detected in any of other sequenced beetle genomes, but such an ortholog  
379 was found in the transcriptome data of *Tenebrio molitor*, a species that is closely related to  
380 *Tribolium*. A phylogenetic tree of the various RTKs and IRTKL proteins suggests that the origin  
381 of the IRTKL proteins in Lepidoptera is ancient, but that of *Tribolium* is quite recent, indicating  
382 convergent evolution (Fig. 11). In chelicerates there are also two types of RTK, while there are  
383 four in decapods (Veenstra, 2020), however the various gene duplications of the arthropod RTKs  
384 occurred after these groups diverged (Fig. 11).

385 *Drosophila* LGR3 is activated by *Drosophila* ilp 8 and orthologs of this receptor are present in  
386 many but not all arthropods, always in a single copy. As described LGR4 is likely the arthropod  
387 relaxin receptor and is similarly present in many arthropods, usually in a single copy, but  
388 chelicerates have two copies and some spider have even three. LGR3 and LGR4 are closely  
389 related GPCRs together with another receptor that was first described from the pond snail  
390 *Lymnaea stagnalis* as GRL101 (Tensen et al., 1994) to stress its similarity with LGR3 and LGR4  
391 it is called here LGR5. The strong sequence similarity of LGR5 with LGR3 and LGR4 suggests  
392 that it, like LGR3 and LGR4 might have an insulin-like ligand and for this reason it is included  
393 here. LGR5 is commonly present in arthropods. Unlike LGR3 and LGR4, that are missing in  
394 many insect species, LGR5 is consistently present in hemimetabolous insects, but it is completely  
395 absent from all holometabolous insects (the GRL101 from *Rhagoletis zephyria* [XP\_017487580]  
396 is appears to be a mite GPCR). In both chelicerates and decapods there are usually several  
397 paralogs (Fig. 12). All three of these receptors are widely expressed and it is difficult to discern  
398 clear expression patterns (Suppl. Spreadsheet 2).  
399

## 400 Discussion

401 I describe a number of novel arthropod ilps, the gonadulins and aIGFs, that are putative orthologs  
402 of *Drosophila* ilp 8 and ilp 6 respectively and I present evidence that the genes coding these  
403 peptides and relaxin are commonly present in arthropods and most likely originated from an  
404 ancient gene triplication.  
405 There are four arguments that together suggests that the various gonadulins and *Drosophila* ilp 8  
406 are indeed orthologs. First, the gonadulins cluster together with *Drosophila* ilp 8 on on a  
407 sequence similarity tree that bundles peptides with similar structures. It is clear that even though  
408 the amino acid sequences of the gonadulins are poorly conserved, they do resemble one another  
409 better than each one of them resembles any of the better known arthropod ilps. Secondly, for  
410 those members of this group where this could be determined, they are all made by the gonads,  
411 although this is not the only tissue expressing these peptides and expression by the gonads is  
412 variable. Thirdly, all species for which a gonadulin could be identified also have an ortholog of  
413 *Drosophila* LGR3, even though not all arthropod species have such a receptor. Unfortunately,  
414 due to the large structural variability of the gonadulins, it was not always possible to demonstrate  
415 the existence of a gonadulin gene in each species that has an ortholog of LGR3. Nevertheless, no  
416 gonadulins were found in species lacking such a receptor. Finally, peptides that were identified as

417 putative gonadulins, but that are present in species as distantly related as spiders on one hand and  
418 stick insects and cockroaches on the other, are produced by genes for which orthology is  
419 independently confirmed by synteny with aIGF genes.

420 The physiological significance of the presence of both aIGF and BIGFLP in *Bombyx* is an  
421 intriguing question, perhaps even more so as there seems to be only a single insulin receptor in  
422 this species that might induce an intracellular response. As shown by the data of an impressive set  
423 of transcriptome SRAs from this species, expression of the two differs during development (Fig.  
424 6). Although the physiological meaning of this remains to be investigated, it is tempting to  
425 speculate that it is related to oogenesis and metamorphosis taking place simultaneously. In most  
426 insect species juvenile hormone and ecdysone play preponderant roles in the regulation of both  
427 processes, but using the same hormones for two different processes at the same time might be  
428 counterproductive and may have led to the evolution of BIGFLP.

429 It has been reported previously that, unlike *Drosophila*, most insect species have more than one  
430 insulin RTK (Kremer, Korb & Bornberg-Bauer, 2016). This is confirmed here and in the  
431 American cockroach there are actually four insulin RTKs. The presence of three insulin RTKs in  
432 termites has led to the suggestion that they might be involved in caste determination (Kremer,  
433 Korb & Bornberg-Bauer, 2016). Although this may be so, it is somewhat surprising in this  
434 context that the American cockroach, a close relative, has even four such receptors, yet has no  
435 caste system. In Lepidoptera and at least two tenebrionid beetles one of the putative insulin  
436 receptors lacks the tyrosine kinase domain, like the vertebrate IGF2 receptor and the *Drosophila*  
437 decoy insulin receptor (Okamoto et al., 2013). The *Drosophila* receptor also lacks the  
438 transmembrane domain and is released into the hemolymph. These receptors may well have  
439 similar role in regulating the hemolymph ilp concentrations.

440 In some insects the expression of insulin RTKs have been studied sometimes together with the  
441 effects of inactivating one or both insulin RTKs by RNAi (Wheeler, Buck & Evans, 2006; Sang  
442 et al., 2016; Okada et al., 2019). Interestingly, in honeybee larvae that are changed from worker  
443 food to royal jelly, that is rich in proteins, it is the RTK A that is upregulated (Wheeler, Buck &  
444 Evans, 2006), whereas in two beetle species the effects of RTK inactivation by RNAi is much  
445 stronger for type A than for type B (Sang et al., 2016; Okada et al., 2019). In the honeybee and  
446 the beetle *Gnatocerus* these receptors have been indirectly linked to an aIGF peptide. In Diptera  
447 and in the head louse there is only a single RTK, which in both case are also type A and this is  
448 also the type that is most abundantly expressed in insects. This suggests that the A type insulin  
449 RTK is more important than the B type RTK.

450 The structural difference between neuroendocrine ilps and aIGFs, as illustrated by the large C-  
451 terminal extensions absent in the former but present in the latter, suggest the use of different  
452 receptors. Indeed, the similarities between insulin and vertebrate IGF on one hand and insect  
453 neuroendocrine ilps and aIGF on the other, are striking. Thus whereas the liver is the major tissue  
454 expressing IGF, in insects aIGF is expressed by the fat body, the tissue that performs the  
455 functions of both the vertebrate liver and adipose tissue. Furthermore, both IGF and aIGF are C-  
456 terminally extended insulin-like molecules and in both cases the primary transcripts produced are  
457 alternatively spliced (Roberts et al., 1987). Finally, insulin and IGF act on two RTKs and many  
458 insects also seem to have two insulin RTKs, although structural similarity is insufficient proof  
459 that these are insulin receptors, as illustrated by the insulin receptor-related receptor that  
460 functions as an alkali receptor (Deyev et al., 2011). Nevertheless, this suggests that the C-  
461 terminal extension of aIGF may allow for the differential activation of two different types of  
462 insulin RTKs and the presence of only one insulin receptor in Diptera may well explain why  
463 *Drosophila* ilp 6 has lost this C-terminal extension. Furthermore, it is perhaps no coincidence that  
464 the ilps that did not separately clearly into either an aIGF or an insulin branch on the sequence  
465 similarity tree (Fig. 2) are from *Drosophila*, *Glossina* and *Pediculus*. These are species that have  
466 only one insulin RTK and thus there would be no physiological need to maintain different  
467 molecular structures for peptides in order to preferentially activate one or the other of the two  
468 insulin RTKs.

469 The close genomic association of the gonadulin, relaxin and IGF genes in some arthropod  
470 genomes suggest that they originated from an ancient gene triplication. Although the primary  
471 amino acid sequences of the different gonadulins is limited, as discussed above, there is reason to  
472 believe they are also orthologs and the same holds for the various aIGFs. The *Drosophila*  
473 gonadulin (dilp 8) receptor has been shown to be *Drosophila* LGR3, while LGR4 must be an  
474 arthropod relaxin receptor. As demonstrated by the sequence similarity of their transmembrane  
475 regions, these LGRs and LGR5 are evolutionary cousins. Insect aIGFs on the other hand are  
476 known to stimulate RTKs. When neuropeptide genes undergo a local duplication the ligands they  
477 encode either keep using the same receptor or use paralogs that have their origin in a gene  
478 duplication of the receptor. The gene coding aIGF that uses an RTK is flanked on both sides by  
479 genes that code LGR ligands. The only reasonable explanation is that the original gene coding for  
480 an insulin-like peptide (the one that got triplicated) used both types of receptors, *i.e.* it had two  
481 receptors, both an LGR and an RTK.

482 It is clear that during evolution at least holometabolous species no longer have such a GPCR, as  
483 these species have at most only two such receptors, LGR3 and LGR4 (for gonadulin and relaxin  
484 respectively), while some species have none. Nevertheless, it is interesting to note that the  
485 hemimetabolous insects have LGR5, a receptor that is evolutionarily closely related to the  
486 receptors for gonadulin and relaxin. Thus LGR5 could be a second receptor for aIGF. If this were  
487 so, then the remarkable absence of LGR5 from holometabolous species might be related to the  
488 switch to holometaboly itself. Maggots and caterpillars undergo essentially linear growth, while  
489 in non-holometabolous species, growth is accompanied by development at the same time.  
490 Perhaps, LGR5 stimulated by aIGF is responsible for this.

491 Arthropod relaxin has an primary amino acid sequence that is much better conserved than that of  
492 the typical arthropod insulins or IGFs. As arthropod relaxin shares what seem to be the structural  
493 characteristics common to both aIGF and neuroendocrine insulins, it seems plausible that relaxin  
494 can also stimulate the insulin RTK. It is of interest in this respect that *Drosophila* relaxin, ilp7,  
495 binds to the decoy insulin receptor as well other *Drosophila* ilps (Okamoto et al., 2013) and  
496 previous work suggested that it acts through the *Drosophila* RTK (Linneweber et al., 2014).  
497 When there is only a single receptor for a ligand, both can co-evolve and over time structures of  
498 both the ligand and its receptor may change. However, when the ligand activates two different  
499 receptors, all three components have to coevolve and one would expect that this would restrain  
500 the structures of all three elements much more than when there is only a single receptor and such  
501 restraints would be the strongest on the ligand that activates both receptors. This might explain  
502 why arthropod relaxin is so well conserved.

503 It is tempting to speculate that orthologous genes have similar expression patterns and functions.  
504 In related species this is a reasonable hypothesis and the observed expression of aIGFs in  
505 cockroaches (Castro-Arnau et al., 2019) and beetles (Okada et al., 2019) is predominantly in the  
506 fat body and this seems to be the case for *Bombyx* aIGF too. What is likely the *Rhodnius* aIGF is  
507 also expressed by the fat body (Defferrari, Orchard & Lange, 2015) as is *Drosophila* ilp 6  
508 (Okamoto et al., 2009b). This suggest that within insects these peptides have the same function. It  
509 is notable however, that at least in *Pardosa* spiders the fat body does not express aIGF but a  
510 specific insulin (Yu et al., 2020), while aIGFs expression is limited to the cephalothorax. This  
511 suggests that in spiders aIGFs are expressed in the brain, is indeed observed in the spider  
512 *Stegodyphus dumicola* (Suppl. Spreadsheet 2). In decapods, which are more closely related to  
513 insects than chelicerates, no aIGFs were found (Veenstra, 2020). The phylogenetic tree of the  
514 various arthropod insulin RTKs also shows that the various paralogs of this receptor are not direct



515 orthologs of one another, but must have evolved independently in each subphylum or even class.  
516 This within arthropods the functions of the various insulin-like peptides may be significantly  
517 different. It suggests that the apparent resemblance between insect neuroendocrine insulins and  
518 aIGF on one hand and insulin and IGF on the other could reflect a case of convergent evolution  
519 rather than one of orthology.  
520 In the beetle *Gnatocerus cornutus* it has been shown that aIGF specifically stimulates the growth  
521 of a sexual ornament (Okada et al., 2019), while higher levels of aIGF are observed in honeybee  
522 larvae that are destined to become queens and thus develop functional ovaries (Wheeler, Buck &  
523 Evans, 2006). In *Gnatocerus* aIGF release depends on nutrition status and in honeybees protein  
524 rich royal jelly is associated with an increase of aIGF. Although we don't know as much detail for  
525 *Blattella* aIGF, its expression is strongly inhibited during starvation (Castro-Arnau et al., 2019).  
526 This suggests that in insects aIGF is released by the fat body in response to nutritious food.  
527 The physiological function of gonadulin is less clear. Insulin and related peptides typically  
528 stimulate growth and reproduction, so its presence in the ovaries and testes suggests a function in  
529 reproduction. Its presence in unfecundated eggs of *Blattella* suggests that within the ovary it are  
530 the oocytes themselves that express gonadulin, likely the follicle cells that in *Drosophila* have  
531 been shown to express *Drosophila* ilp 8 (Liao & Nässel, 2020). In the crab *Portunus*  
532 *trituberculatus* gonadulin expression is on occasion very high in the gonads (Veenstra, 2020), but  
533 the very variable degree of expression makes it difficult to see this hormone as merely  
534 stimulating reproduction. The expression of gonadulin in hematopoietic tissue and the anterior  
535 proliferation center of the brain in *Procambarus clarkii* (Veenstra, 2020), neither suggest a role  
536 limited to reproduction but hints at a more general role in promoting growth. Spider silks are  
537 proteins and thus its production requires plenty of amino acids, not unlike vitellogenesis, or the  
538 development and reparation of imaginal disks. Gonadulin secreted by these organs might  
539 therefore suggest that, not unlike insulin, it stimulates growth, but more intensely and/or more  
540 localized. Such an intensified stimulation of growth might be achieved by increasing not only the  
541 uptake of glucose as an energy substrate but also that of amino acids. Under this hypothesis, it  
542 might act as both an autocrine to stimulate uptake of metabolites and an endocrine to make these  
543 available and by doing so it might be able to stimulate growth of specific organs, such as  
544 imaginal disks and/or gonads that secrete it.

545

546

547

## 548 **Conclusions**

549 A local gene triplication in an early ancestor likely yielded three genes coding gonadulin,  
550 arthropod insulin-like growth factor and relaxin. Orthologs of these genes are now commonly  
551 present in arthropods and almost certainly include the *Drosophila* insulin-like peptides 6, 7 and 8.

552

553

554

555

556

557

558

## 559 **Acknowledgements**

560 I thank an anonymous reviewer and Jennifer Hackney Price for reviewing my manuscript, I also  
561 acknowledge the contributions made by all those who not only produced but also made available  
562 the numerous SRAs that I analyzed here. This work would neither have been possible without the  
563 various programs employed.

564

565

566

567

## 568 **References**

569 Almagro Armenteros JJ, Tsirigos KD, Sønderby CK, Petersen TN, Winther O, Brunak S, von  
570 Heijne G, Nielsen H. 2019. SignalP 5.0 improves signal peptide predictions using deep neural  
571 networks. *Nat Biotechnol.* 37:420-423. doi: 10.1038/s41587-019-0036-z.

572 Attardo GM, Abd-Alla AMM, Acosta-Serrano A, Allen JE, Bateta R, Benoit JB, Bourtzis K,  
573 Caers J, Caljon G, Christensen MB, Farrow DW, Friedrich M, Hua-Van A, Jennings EC, Larkin  
574 DM, Lawson D, Lehane MJ, Lenis VP, Lowy-Gallego E, Macharia RW, Malacrida AR, Marco  
575 HG, Masiga D, Maslen GL, Matetovici I, Meisel RP, Meki I, Michalkova V, Miller WJ, Minx P,  
576 Mireji PO, Ometto L, Parker AG, Rio R, Rose C, Rosendale AJ, Rota-Stabelli O, Savini G,  
577 Schoofs L, Scolari F, Swain MT, Takáč P, Tomlinson C, Tsiamis G, Van Den Abbeele J,  
578 Vigneron A, Wang J, Warren WC, Waterhouse RM, Weirauch MT, Weiss BL, Wilson RK, Zhao  
579 X, Aksoy S. 2019. Comparative genomic analysis of six *Glossina* genomes, vectors of African  
580 trypanosomes. *Genome Biol.* 20:187. doi: 10.1186/s13059-019-1768-2.

581 Brogiolo W, Stocker H, Ikeya T, Rintelen F, Fernandez R, Hafen E. 2001. An evolutionarily  
582 conserved function of the *Drosophila* insulin receptor and insulin-like peptides in growth control.  
583 *Curr Biol.* 11:213-221. doi: 10.1016/s0960-9822(01)00068-9.

584 Cao Z, Yu Y, Wu Y, Hao P, Di Z, He Y, Chen Z, Yang W, Shen Z, He X, Sheng J, Xu X, Pan B,  
585 Feng J, Yang X, Hong W, Zhao W, Li Z, Huang K, Li T, Kong Y, Liu H, Jiang D, Zhang B, Hu  
586 J, Hu Y, Wang B, Dai J, Yuan B, Feng Y, Huang W, Xing X, Zhao G, Li X, Li Y, Li W. 2013.  
587 The genome of *Mesobuthus martensii* reveals a unique adaptation model of arthropods. *Nat*  
588 *Commun.* 4:2602. doi: 10.1038/ncomms3602.

- 589 Castellanos MC, Tang JC, Allan DW. 2013. Female-biased dimorphism underlies a female-  
590 specific role for post-embryonic Ilp7 neurons in *Drosophila* fertility. *Development*. 140:3915-  
591 3926. doi: 10.1242/dev.094714.
- 592 Castro-Arnau J, Marín A, Castells M, Ferrer I, Maestro JL. 2019. The expression of cockroach  
593 insulin-like peptides is differentially regulated by physiological conditions and affected by  
594 compensatory regulation. *J Insect Physiol*. 114:57-67. doi: 10.1016/j.jinsphys.2019.02.010.
- 595 Chandler JC, Gandhi NS, Mancera RL, Smith G, Elizur A, Ventura T. 2017. Understanding  
596 Insulin Endocrinology in Decapod Crustacea: Molecular Modelling Characterization of an  
597 Insulin-Binding Protein and Insulin-Like Peptides in the Eastern Spiny Lobster, *Sagmariasus*  
598 *verreauxi*. *Int J Mol Sci*. 18. pii: E1832. doi: 10.3390/ijms18091832.
- 599 Colombani J, Andersen DS, Léopold P. 2012. Secreted peptide Dilp8 coordinates *Drosophila*  
600 tissue growth with developmental timing. *Science*. 336:582-5. doi: 10.1126/science.1216689.
- 601 Colombani J, Andersen DS, Boulan L, Boone E, Romero N, Virolle V, Texada M, Léopold P.  
602 2015. *Drosophila* Lgr3 Couples Organ Growth with Maturation and Ensures Developmental  
603 Stability. *Curr Biol*. 25:2723-2729. doi: 10.1016/j.cub.2015.09.020.
- 604 Defferrari MS, Orchard I, Lange AB. 2015. An insulin-like growth factor in *Rhodnius prolixus* is  
605 involved in post-feeding nutrient balance and growth. *Front Neurosci*. 10:566. doi:  
606 10.3389/fnins.2016.00566.
- 607 Deyev IE, Sohet F, Vassilenko KP, Serova OV, Popova NV, Zozulya SA, Burova EB, Houillier  
608 P, Rzhnevsky DI, Berchatova AA, Murashev AN, Chugunov AO, Efremov RG, Nikol'sky NN,  
609 Bertelli E, Eladari D, Petrenko AG. 2011. Insulin receptor-related receptor as an extracellular  
610 alkali sensor. *Cell Metab*. 13:679-689. doi: 10.1016/j.cmet.2011.03.022.
- 611 Garelli A, Gontijo AM, Miguela V, Caparros E, Dominguez M. 2012. Imaginal discs secrete  
612 insulin-like peptide 8 to mediate plasticity of growth and maturation. *Science*. 336:579-582. doi:  
613 10.1126/science.1216735.
- 614 Garelli A, Heredia F, Casimiro AP, Macedo A, Nunes C, Garcez M, Dias ARM, Volonte YA,  
615 Uhlmann T, Caparros E, Koyama T, Gontijo AM. 2015. Dilp8 requires the neuronal relaxin  
616 receptor Lgr3 to couple growth to developmental timing. *Nat Commun*. 6:8732. doi:  
617 10.1038/ncomms9732.
- 618 Gontijo AM, Garelli A. 2018. The biology and evolution of the Dilp8-Lgr3 pathway: A relaxin-  
619 like pathway coupling tissue growth and developmental timing control. *Mech Dev*. 154:44-50.  
620 doi: 10.1016/j.mod.2018.04.005.
- 621 Gouy M, Guindon S, Gascuel O. 2010. SeaView version 4: A multiplatform graphical user  
622 interface for sequence alignment and phylogenetic tree building. *Mol Biol Evol*. 2010  
623 Feb;27(2):221-4. doi: 10.1093/molbev/msp259.
- 624 Grabherr MG, Haas BJ, Yassour M, Levin JZ, Thompson DA, Amit I, Adiconis X, Fan L,  
625 Raychowdhury R, Zeng Q, Chen Z, Mauceli E, Hacohen N, Gnirke A, Rhind N, di Palma F,  
626 Birren BW, Nusbaum C, Lindblad-Toh K, Friedman N, Regev A. 2011. Full-length  
627 transcriptome assembly from RNA-Seq data without a reference genome. *Nat Biotechnol*.  
628 15;29:644-652. doi: 10.1038/nbt.1883.
- 629 Grbić M, Van Leeuwen T, Clark RM, Rombauts S, Rouzé P, Grbić V, Osborne EJ, Dermauw W,  
630 Ngoc PC, Ortego F, Hernández-Crespo P, Diaz I, Martinez M, Navajas M, Sucena É, Magalhães

631 S, Nagy L, Pace RM, Djuranović S, Smagghe G, Iga M, Christiaens O, Veenstra JA, Ewer J,  
632 Villalobos RM, Hutter JL, Hudson SD, Velez M, Yi SV, Zeng J, Pires-daSilva A, Roch F,  
633 Cazaux M, Navarro M, Zhurov V, Acevedo G, Bjelica A, Fawcett JA, Bonnet E, Martens C,  
634 Baele G, Wissler L, Sanchez-Rodriguez A, Tirry L, Blais C, Demeestere K, Henz SR, Gregory  
635 TR, Mathieu J, Verdon L, Farinelli L, Schmutz J, Lindquist E, Feyereisen R, Van de Peer Y.  
636 2011. The genome of *Tetranychus urticae* reveals herbivorous pest adaptations. *Nature*. 479:487-  
637 492. doi: 10.1038/nature10640.

638 Grönke S, Clarke DF, Broughton S, Andrews TD, Partridge L. 2010. Molecular evolution and  
639 functional characterization of *Drosophila* insulin-like peptides. *PLoS Genet*. 6:e1000857. doi:  
640 10.1371/journal.pgen.1000857.

641 Harrison MC, Jongepier E, Robertson HM, Arning N, Bitard-Feildel T, Chao H, Childers CP,  
642 Dinh H, Doddapaneni H, Dugan S, Gowin J, Greiner C, Han Y, Hu H, Hughes DST, Huylmans  
643 AK, Kemena C, Kremer LPM, Lee SL, Lopez-Ezquerria A, Mallet L, Monroy-Kuhn JM, Moser  
644 A, Murali SC, Muzny DM, Otani S, Piulachs MD, Poelchau M, Qu J, Schaub F, Wada-  
645 Katsumata A, Worley KC, Xie Q, Ylla G, Poulsen M, Gibbs RA, Schal C, Richards S, Belles X,  
646 Korb J, Bornberg-Bauer E. 2018. Hemimetabolous genomes reveal molecular basis of termite  
647 eusociality. *Nat Ecol Evol*. 2:557-566. doi: 10.1038/s41559-017-0459-1.

648 Herndon N, Shelton J, Gerischer L, Ioannidis P, Ninova M, Dönitz J, Waterhouse RM, Liang C,  
649 Damm C, Siemanowski J, Kitzmann P, Ulrich J, Dippel S, Oberhofer G, Hu Y, Schwirz J,  
650 Schacht M, Lehmann S, Montino A, Posnien N, Gurska D, Horn T, Seibert J, Vargas Jentsch  
651 IM, Panfilio KA, Li J, Wimmer EA, Stappert D, Roth S, Schröder R, Park Y, Schoppmeier M,  
652 Chung HR, Klingler M, Kittelmann S, Friedrich M, Chen R, Altincicek B, Vilcinskis A,  
653 Zdobnov E, Griffiths-Jones S, Ronshaugen M, Stanke M, Brown SJ, Bucher G. 2020. Enhanced  
654 genome assembly and a new official gene set for *Tribolium castaneum*. *BMC Genomics*. 21:47.  
655 doi: 10.1186/s12864-019-6394-6.

656 Jaszczak JS, Wolpe JB, Bhandari R, Jaszczak RG, Halme A. 2016. Growth coordination during  
657 *Drosophila melanogaster* imaginal disc regeneration is mediated by signaling through the relaxin  
658 receptor LGR3 in the prothoracic gland. 204:703-709. doi: 10.1534/genetics.116.193706.

659 Kawamoto M, Jouraku A, Toyoda A, Yokoi K, Minakuchi Y, Katsuma S, Fujiyama A, Kiuchi T,  
660 Yamamoto K, Shimada T. 2019. High-quality genome assembly of the silkworm, *Bombyx mori*.  
661 *Insect Biochem Mol Biol*. 107:53-62. doi: 10.1016/j.ibmb.2019.02.002.

662 Kremer LPM, Korb J, Bornberg-Bauer E. 2016. Reconstructed evolution of insulin receptors in  
663 insects reveals duplications in early insects and cockroaches. *J Exp Zool B Mol Dev Evol*.  
664 330:305-311. doi: 10.1002/jez.b.22809.

665 Lange A, Beier S, Huson DH, Parusel R, Iglauer F, Frick JS. 2018. Genome Sequence of  
666 *Galleria mellonella* (Greater Wax Moth). *Genome Announc*. 6. pii: e01220-17. doi:  
667 10.1128/genomeA.01220-17.

668 Li S, Zhu S, Jia Q, Yuan D, Ren C, Li K, Liu S, Cui Y, Zhao H, Cao Y, Fang G, Li D, Zhao X,  
669 Zhang J, Yue Q, Fan Y, Yu X, Feng Q, Zhan S. 2018. The genomic and functional landscapes of  
670 developmental plasticity in the American cockroach. *Nat Commun*. 9:1008. doi: 10.1038/s41467-  
671 018-03281-1.

672 Liao S, Nässel DR. 2020. *Drosophila* insulin-like peptide 8 (DILP8) in ovarian follicle cells  
673 regulates ovulation and metabolism. bioRxiv. doi: <https://doi.org/10.1101/2020.05.02.073585>.  
674 Linneweber GA, Jacobson J, Busch KE, Hudry B, Christov CP, Dormann D, Yuan M, Otani T,  
675 Knust E, de Bono M, Miguel-Aliaga I. 2014. Neuronal control of metabolism through nutrient-  
676 dependent modulation of tracheal branching. *Cell*. 156:69-83. doi: 10.1016/j.cell.2013.12.008.  
677 Liu Y, Liao S, Veenstra JA, Nässel DR. 2016. *Drosophila* insulin-like peptide 1 (DILP1) is  
678 transiently expressed during non-feeding stages and reproductive dormancy. *Sci Rep*. 6:26620.  
679 doi: 10.1038/srep26620.  
680 Liu S, Aageaard A, Bechsgaard J, Bilde T. 2019. DNA Methylation Patterns in the Social Spider,  
681 *Stegodyphus dumicola*. 2019. *Genes (Basel)*. 10. pii: E137. doi: 10.3390/genes10020137.  
682 Matthews BJ, Dudchenko O, Kingan SB, Koren S, Antoshechkin I, Crawford JE, Glassford WJ,  
683 Herre M, Redmond SN, Rose NH, Weedall GD, Wu Y, Batra SS, Brito-Sierra CA, Buckingham  
684 SD, Campbell CL, Chan S, Cox E, Evans BR, Fansiri T, Filipović I, Fontaine A, Gloria-Soria A,  
685 Hall R, Joardar VS, Jones AK, Kay RGG, Kodali VK, Lee J, Lycett GJ, Mitchell SN, Muehling  
686 J, Murphy MR, Omer AD, Partridge FA, Peluso P, Aiden AP, Ramasamy V, Rašić G, Roy S,  
687 Saavedra-Rodriguez K, Sharan S, Sharma A, Smith ML, Turner J, Weakley AM, Zhao Z, Akbari  
688 OS, Black WC 4th, Cao H, Darby AC, Hill CA, Johnston JS, Murphy TD, Raikhel AS, Sattelle  
689 DB, Sharakhov IV, White BJ, Zhao L, Aiden EL, Mann RS, Lambrechts L, Powell JR,  
690 Sharakhova MV, Tu Z, Robertson HM, McBride CS, Hastie AR, Korfach J, Neafsey DE,  
691 Phillippy AM, Vosshall LB. 2018. Improved reference genome of *Aedes aegypti* informs  
692 arbovirus vector control. *Nature*. 563:501-507. doi: 10.1038/s41586-018-0692-z.  
693 Miguel-Aliaga I, Thor S, Gould AP. 2008. Postmitotic specification of *Drosophila* insulinergic  
694 neurons from pioneer neurons. *PLoS Biol* 6: e58. doi:10.1371/journal.pbio.0060058.  
695 Mizoguchi A, Okamoto N. 2013. Insulin-like and IGF-like peptides in the silkworm *Bombyx*  
696 *mori*: discovery, structure, secretion, and function. *Front Physiol*. 2013 4:217. doi:  
697 10.3389/fphys.2013.00217.  
698 Murphy CT, Hu PJ. 2013. Insulin/insulin-like growth factor signaling in *C. elegans*. *WormBook*,  
699 ed. The *C. elegans* Research Community, WormBook. 2013. doi: 10.1895/wormbook.1.164.1.  
700 Nagasawa H, Kataoka H, Isogai A, Tamura S, Suzuki A, Ishizaki H, Mizoguchi A, Fujiwara Y,  
701 Suzuki A. 1984. Amino-terminal amino Acid sequence of the silkworm prothoracicotropic  
702 hormone: homology with insulin. *Science*.226:1344-1345. doi: 10.1126/science.226.4680.1344.  
703 Nagasawa H, Kataoka H, Isogai A, Tamura S, Suzuki A, Mizoguchi A, Fujiwara Y, Suzuki A,  
704 Takahashi SY, Ishizaki H. 1986. Amino acid sequence of a prothoracicotropic hormone of the  
705 silkworm *Bombyx mori*. *Proc Natl Acad Sci U S A*. 83:5840-5843. doi: 10.1073/pnas.83.16.5840.  
706 Nässel DR, Vanden Broeck J. 2016. Insulin/IGF signaling in *Drosophila* and other insects:  
707 factors that regulate production, release and post-release action of the insulin-like peptides. *Cell*  
708 *Mol Life Sci*. 2016 Jan;73(2):271-90. doi: 10.1007/s00018-015-2063-3.  
709 O'Brien LE, Soliman SS, Li X, Bilder D. 2011. Altered modes of stemcell division drive  
710 adaptive intestinal growth. *Cell* 147:603–614. doi: 10.1016/j.cell.2011.08.048.  
711 Okada Y, Katsuki M, Okamoto N, Fujioka H, Okada K. 2019a. A specific type of insulin-like  
712 peptide regulates the conditional growth of a beetle weapon. *PLoS Biol*. 17:e3000541. doi:  
713 10.1371/journal.pbio.3000541.

- 714 Okamoto N, Yamanaka N, Satake H, Saegusa H, Kataoka H, Mizoguchi A. 2009a. An  
715 ecdysteroid-inducible insulin-like growth factor-like peptide regulates adult development of the  
716 silkworm *Bombyx mori*. FEBS J. 276:1221-1332. doi: 10.1111/j.1742-4658.2008.06859.x.
- 717 Okamoto N, Yamanaka N, Yagi Y, Nishida Y, Kataoka H, O'Connor MB, Mizoguchi A. 2009b.  
718 A fat body-derived IGF-like peptide regulates postfeeding growth in *Drosophila*. Dev Cell.  
719 17:885-891. doi: 10.1016/j.devcel.2009.10.008.
- 720 Okamoto N, Nakamori R, Murai T, Yamauchi Y, Masuda A, Nishimura T. 2013. A secreted  
721 decoy of InR antagonizes insulin/IGF signaling to restrict body growth in *Drosophila*. Genes  
722 Dev. 27:87-97. doi: 10.1101/gad.204479.112.
- 723 Panfilio KA, Vargas Jentsch IM, Benoit JB, Erezyilmaz D, Suzuki Y, Colella S, Robertson HM,  
724 Poelchau MF, Waterhouse RM, Ioannidis P, Weirauch MT, Hughes DST, Murali SC, Werren JH,  
725 Jacobs CGC, Duncan EJ, Armisén D, Vreede BMI, Baa-Puyoulet P, Berger CS, Chang CC, Chao  
726 H, Chen MM, Chen YT, Childers CP, Chipman AD, Cridge AG, Crumière AJJ, Dearden PK,  
727 Didion EM, Dinh H, Doddapaneni HV, Dolan A, Dugan S, Extavour CG, Febvay G, Friedrich  
728 M, Ginzburg N, Han Y, Heger P, Holmes CJ, Horn T, Hsiao YM, Jennings EC, Johnston JS,  
729 Jones TE, Jones JW, Khila A, Koelzer S, Kovacova V, Leask M, Lee SL, Lee CY, Lovegrove  
730 MR, Lu HL, Lu Y, Moore PJ, Munoz-Torres MC, Muzny DM, Palli SR, Parisot N, Pick L, Porter  
731 ML, Qu J, Refki PN, Richter R, Rivera-Pomar R, Rosendale AJ, Roth S, Sachs L, Santos ME,  
732 Seibert J, Sghaier E, Shukla JN, Stancliffe RJ, Tidswell O, Traverso L, van der Zee M, Viala S,  
733 Worley KC, Zdobnov EM, Gibbs RA, Richards S. 2019. Molecular evolutionary trends and  
734 feeding ecology diversification in the Hemiptera, anchored by the milkweed bug genome.  
735 Genome Biol. 20:64. doi: 10.1186/s13059-019-1660-0.
- 736 Price MN, Dehal PS, Arkin AP. 2010. FastTree 2--approximately maximum-likelihood trees for  
737 large alignments. PLoS One. 5:e9490. doi: 10.1371/journal.pone.0009490.
- 738 Riesch R, Muschick M, Lindtke D, Villoutreix R, Comeault AA, Farkas TE, Lucek K, Hellen E,  
739 Soria-Carrasco V, Dennis SR, de Carvalho CF, Safran RJ, Sandoval CP, Feder J, Gries R, Crespi  
740 BJ, Gries G, Gompert Z, Nosil P. 2017. Transitions between phases of genomic differentiation  
741 during stick-insect speciation. Nat Ecol Evol. 1:82. doi: 10.1038/s41559-017-0082.
- 742 Roberts CT Jr, Lasky SR, Lowe WL Jr, Seaman WT, LeRoith D. 1987. Molecular cloning of rat  
743 insulin-like growth factor I complementary deoxyribonucleic acids: differential messenger  
744 ribonucleic acid processing and regulation by growth hormone in extrahepatic tissues. Mol  
745 Endocrinol. 1:243-248. doi: 10.1210/mend-2-6-528.
- 746 Rutherford K, Parkhill J, Crook J, Horsnell T, Rice P, Rajandream MA, Barrell B. 2000. Artemis:  
747 sequence visualization and annotation. Bioinformatics. 16:944-945. doi: 10.1093/bioinformatics/  
748 16.10.944.
- 749 Sang M, Li C, Wu W, Li B. 2016. Identification and evolution of two insulin receptor genes  
750 involved in *Tribolium castaneum* development and reproduction. Gene. 585:196-204. doi:  
751 10.1016/j.gene.2016.02.034.
- 752 Schwager EE, Sharma PP, Clarke T, Leite DJ, Wierschin T, Pechmann M, Akiyama-Oda Y,  
753 Esposito L, Bechsgaard J, Bilde T, Buffry AD, Chao H, Dinh H, Doddapaneni H, Dugan S,  
754 Eibner C, Extavour CG, Funch P, Garb J, Gonzalez LB, Gonzalez VL, Griffiths-Jones S, Han Y,  
755 Hayashi C, Hilbrant M, Hughes DST, Janssen R, Lee SL, Maeso I, Murali SC, Muzny DM,

756 Nunes da Fonseca R, Paese CLB, Qu J, Ronshaugen M, Schomburg C, Schönauer A, Stollewerk  
757 A, Torres-Oliva M, Turetzek N, Vanthournout B, Werren JH, Wolff C, Worley KC, Bucher G,  
758 Gibbs RA, Coddington J, Oda H, Stanke M, Ayoub NA, Prpic NM, Flot JF, Posnien N, Richards  
759 S, McGregor AP. 2017. The house spider genome reveals an ancient whole-genome duplication  
760 during arachnid evolution. *BMC Biol.* 15:62. doi: 10.1186/s12915-017-0399-x.

761 Sievers F, Wilm A, Dineen D, Gibson TJ, Karplus K, Li W, Lopez R, McWilliam H, Remmert  
762 M, Söding J, Thompson JD, Higgins DG. 2011. Fast, scalable generation of high-quality protein  
763 multiple sequence alignments using Clustal Omega. *Mol Syst Biol.* 7:539. doi:  
764 10.1038/msb.2011.75.

765 Slaidina M, Delanoue R, Gronke S, Partridge L, Léopold P. 2009. A *Drosophila* insulin-like  
766 peptide promotes growth during nonfeeding states. *Dev Cell.* 17:874-884. doi:  
767 10.1016/j.devcel.2009.10.009.

768 Seecof RL, Dewhurst S. 1974. Insulin is a *Drosophila* hormone and acts to enhance the  
769 differentiation of embryonic *Drosophila* cells. *Cell Differ* 3: 63-70. doi: 10.1016/0045-  
770 6039(74)90041-4.

771 Smit AB, Vreugdenhil E, Ebberink RH, Geraerts WP, Klootwijk J, Joosse J. 1988. Growth-  
772 controlling molluscan neurons produce the precursor of an insulin-related peptide. *Nature.*  
773 31:535-538. doi: 10.1038/331535a0.

774 Tensen CP, Van Kesteren ER, Planta RJ, Cox KJ, Burke JF, van Heerikhuizen H, Vreugdenhil E.  
775 1994. A G protein-coupled receptor with low density lipoprotein-binding motifs suggests a role  
776 for lipoproteins in G-linked signal transduction. *Proc Natl Acad Sci U S A.* 91:4816-4820. doi:  
777 10.1073/pnas.91.11.4816.

778 Terrapon N, Li C, Robertson HM, Ji L, Meng X, Booth W, Chen Z, Childers CP, Glastad KM,  
779 Gokhale K, Gowin J, Gronenberg W, Hermansen RA, Hu H, Hunt BG, Huylmans AK, Khalil  
780 SM, Mitchell RD, Munoz-Torres MC, Mustard JA, Pan H, Reese JT, Scharf ME, Sun F, Vogel  
781 H, Xiao J, Yang W, Yang Z, Yang Z, Zhou J, Zhu J, Brent CS, Elisk CG, Goodisman MA,  
782 Liberles DA, Roe RM, Vargo EL, Vilcinskis A, Wang J, Bornberg-Bauer E, Korb J, Zhang G,  
783 Liebig J. 2014. Molecular traces of alternative social organization in a termite genome. *Nat*  
784 *Commun.* 5:3636. doi: 10.1038/ncomms4636.

785 Vallejo DM, Juarez-Carreño S, Bolivar J, Morante J, Dominguez M. 2015. A brain circuit that  
786 synchronizes growth and maturation revealed through Dilp8 binding to Lgr3. *Science.*  
787 350:aac6767. doi: 10.1126/science.aac6767.

788 Veenstra JA. 2014. The contribution of the genomes of a termite and a locust to our  
789 understanding of insect neuropeptides and neurohormones. *Front Physiol.* 5:454. doi:  
790 10.3389/fphys.2014.00454.

791 Veenstra JA. 2016a. Neuropeptide evolution: Chelicerate neurohormone and neuropeptide genes  
792 may reflect one or more whole genome duplications. *Gen Comp Endocrinol.* 229:41-55. doi:  
793 10.1016/j.ygcen.2015.11.019.

794 Veenstra JA. 2016b. Similarities between decapod and insect neuropeptidomes. *PeerJ* :e2043.  
795 doi: 10.7717/peerj.2043.

796 Veenstra JA. 2020. Gonadulins, the fourth type of Insulin-related peptides in Decapods. *Gen*  
797 *Comp Endocrinol., in press.* doi: 10.1016/j.ygcen.2020.113528.

- 798 Veenstra JA, Rombauts S, Grbić M. 2012. *In silico* cloning of genes encoding neuropeptides,  
799 neurohormones and their putative G-protein coupled receptors in a spider mite. *Insect Biochem*  
800 *Mol Biol.* 42:277-295. doi: 10.1016/j.ibmb.2011.12.009.
- 801 Wheeler DE, Buck N, Evans JD. 2006. Expression of insulin pathway genes during the period of  
802 caste determination in the honey bee, *Apis mellifera*. *Insect Mol Biol.* 15:597-602. doi:  
803 10.1111/j.1365-2583.2006.00681.x.
- 804 Yang CH, Belawat P, Hafen E, Jan LY, Jan YN. 2008. *Drosophila* egg-laying site selection as a  
805 system to study simple decision-making processes. *Science* 319: 1679–1683. doi:  
806 10.1126/science.1151842.
- 807 Yu N, Li J, Liu M, Huang L, Bao H, Yang Z, Zhang Y, Gao H, Wang Z, Yang Y, Van Leeuwen  
808 T, Millar NS, Liu Z. 2019. Genome sequencing and neurotoxin diversity of a wandering spider  
809 *Pardosa pseudoannulata* (pond wolf spider). *BioRxiv*. doi: <https://doi.org/10.1101/747147>.
- 810 Yu N, Han C, Liu Z. 2020. *In silico* identification of the neuropeptidome of the pond wolf spider  
811 *Pardosa pseudoannulata*. *Gen Comp Endocrinol.* 285:113271. doi:  
812 10.1016/j.ygcen.2019.113271.
- 813 Zhan S, Fang G, Cai M, Kou Z, Xu J, Cao Y, Bai L, Zhang Y, Jiang Y, Luo X, Xu J, Xu X,  
814 Zheng L, Yu Z, Yang H, Zhang Z, Wang S, Tomberlin JK, Zhang J, Huang Y. 2020. Genomic  
815 landscape and genetic manipulation of the black soldier fly *Hermetia illucens*, a natural waste  
816 recycler. *Cell Res.* 2020 30:50-60. doi: 10.1038/s41422-019-0252-6.



# Figure 1

Gonadulin sequence alignment.

Note the very large sequence variability of the gonadulin propeptides. Cysteine residues are highlighted in red, other conserved amino residues in black and conserved substitutions in grey. Sequences are from Suppl. Spreadsheet 1.

Drosophila -----SFC SLERMKKFAMEAC EHLFQADEGARRDRRSIEFAH--  
Apis -----ESTRQSLQCKN-IARDVIINSCKGPRMKRSPEKSDTSN-TDQIVK  
Athalia -----IDIYNC KM-KVRDMALKFCSDPAGTRKKRDIS-----IG  
Pediculus -----CDTKWIRLVYMMSCGKKK RDSSTSSFNE-----  
Acyrtosiphon -----CGDEFIKNMIVNVCGMGGIKRSFPD---NSRPDS---  
Cimex -----FMKPTCSKDYLRFMVATACSYAKREVSNDVDMKVVEEFDKH  
Gryllus APAAAAALRSGGSDWEEQRVLHPTCDHDQFRNFMRLSCQYHRRRREVRGAA-----  
Timema -----E CDKARIMNYIMYSCSKKKRSPADH-----LIY  
Blattela -----RPEYEDCNR-KIRQILES CSSEKGRSAE-----  
Daphnia -----SIVAPGAPTCTICDPRAFRQAI VSICTFQR RDIHPISASPDR-----  
Paralithodes-1 -----RPQQQH QHYHQEKRGVRLCSARDVKLIATYV CNLHRRSVRSVALDENSEGDTYIM  
Paralithodes-2 -----WPALRGRRSTSDLCTPREIRRIANDVCNIARRSI-----  
Latrodectus -----FSRREKLFELVHVCTGHDLLNVIKRACAIHKRNE-----  
Pardosa-1 -----QQORLDEMANVCSGQDLVHVVIARAC SIFKRSP-----  
Tetranychus -----ENLIRVCTIKELQ SARSRIC SLYKR SY-----

Drosophila -----HHLNRLGSGKT-----HNKHHYISRS-----  
Apis ATISDV-IEENPVSIEIEPEGSYHVQARMPLQHGFGYGGYGLMPSRFGGIGQNYQS-TNFH  
Athalia -----AES-----ESEVQ-----RS-RDLEIGDPRF-----  
Pediculus -----TLLRNMP SDFYGA-----  
Acyrtosiphon -----SLGLHFR-----GMVT-----DVE  
Cimex FDDVGNVYVTADNEIFHAPLNRYRNHKKHWREVPFKLFKNKRTTDKFGNFQSDWQNFMKISDNP  
Gryllus -----  
Timema PS-----ENWHL-----  
Blattela -----  
Daphnia -----YFYNVN-----  
Paralithodes-1 PGVGGSSVILPWRSLPP CDGPDGD CGGLNSADSPVQQTQRASPPQAPFNMAKRWYALHRFG  
Paralithodes-2 -----RT-----QL-----TPSHHETDWPLLRRTPNG--IPAGHEGTNNYRFS  
Latrodectus -----  
Pardosa-1 -----  
Tetranychus -----

Drosophila -----SYPMGGYLKV-----TREHFNRLSELDFPRY-----KPIKPHHEK  
Apis QSELITPGLEYMDTQYNGLSGGMYGSSLPMPKYLRLRSVKSDDLLGFNL--SPEELEELHD  
Athalia -----GFASLNSGADLGLTL-TONEE-----EDLFMTLSQ  
Pediculus VKYLKEN-----DPQNPMFK-----DDQFLYR-ILEDGIHGFPD---QWEVDEINDD---  
Acyrtosiphon REFKHLVGDIEEVDLLK-TSNNKNKLKEPNVTPWLWR--PINLPGFRDD---RSRHPRI R  
Cimex GFGRFRRLG-LEGASMPSGDIAGIPVPMNREE-----  
Gryllus -----  
Timema -----DLPDAPSHNGGKLSEMLVVA-----MNP SHPVLYEWMMEGEEPTIFD  
Blattela --YDTPSLPMHDE--PLQNAPSSALLGRILGVP SQWT-----ADDV-----KVVFTQLGK  
Daphnia -----EESGTESGSQGERQTYD-----KVVFTQLGK  
Paralithodes-1 TAKGMQAEKENDITEDYRADSNSIDYAPSLSGALPLSELPENVSKFIRVNYPKYVTSLLP  
Paralithodes-2 LPSPLTLSSDVRPGVHSLIRSNTKLSQVLVPLSNTIKARLASQAMVWR--LMLAGMVRK  
Latrodectus -----  
Pardosa-1 -----  
Tetranychus -----

Drosophila K-----HRFKRDHSSRSY-NNIPY CCLNQ---CEEEF C-----  
Apis EIGD-RMPRNSKNLNKKIFQI AMKCCPN--ARL CYDNPRIIP CMGY-----  
Athalia R---LSRAAKNKNQ TMRMINAFAAKCCGENRHDECNDAANVIAC P-----  
Pediculus ---KIN---ENHRRSSKIDK LIEECCKVPVVRT CSEKTKGAC-----  
Acyrtosiphon G---DSGKATI IKREL MNDFRECCNKN---CSLKD LKRI CGKK-----  
Cimex ---LHSGINGNLLYRDIRDTVMKCCTRN---CTVDEFKHL CG-----  
Gryllus ---AADDGGARVARSPSPEADLFAMCCERP---CNVEDE VGVCP-----  
Timema ---DLSKKTRSIFVYPEKAQRVIEQCCDK--EQYCDVNTFLGACK-----  
Blattela ---AVNNANRQVKRSPETIRQLMIDCCLAN---CSPDFELGMC-----  
Daphnia ETLFFPVEVYTA KVKRHREFALHRKCCLSG---CYPMDEASVCMH-----  
Paralithodes-1 HKGKRDKEMSLPVVPRSLSAIRQDCCVK---ECNAED EFGACS-----  
Paralithodes-2 ---RLNRRQTQH QSTTMTLEELRETCCNAQ---CSEQDELAACS-----  
Latrodectus ---HDPT-QPTHPLSIPLQDVSKVCCETP---CRISLE VRLCY-----  
Pardosa-1 ---SEPE-DILYPRSIPLKDIALVCCMP---CRMSLE FRLCS-----  
Tetranychus ---NPNSLMNWIRERRAIISS IASSCCSPG---CPESLLTVGC-----

## Figure 2

Insect ilp sequence similarity tree.

Note that the gonadulins and relaxins are well differentiated from the insulins and aIGFs, but that the latter are only partially separated from one another on the tree. Sequences are from Suppl. Spreadsheet 1.

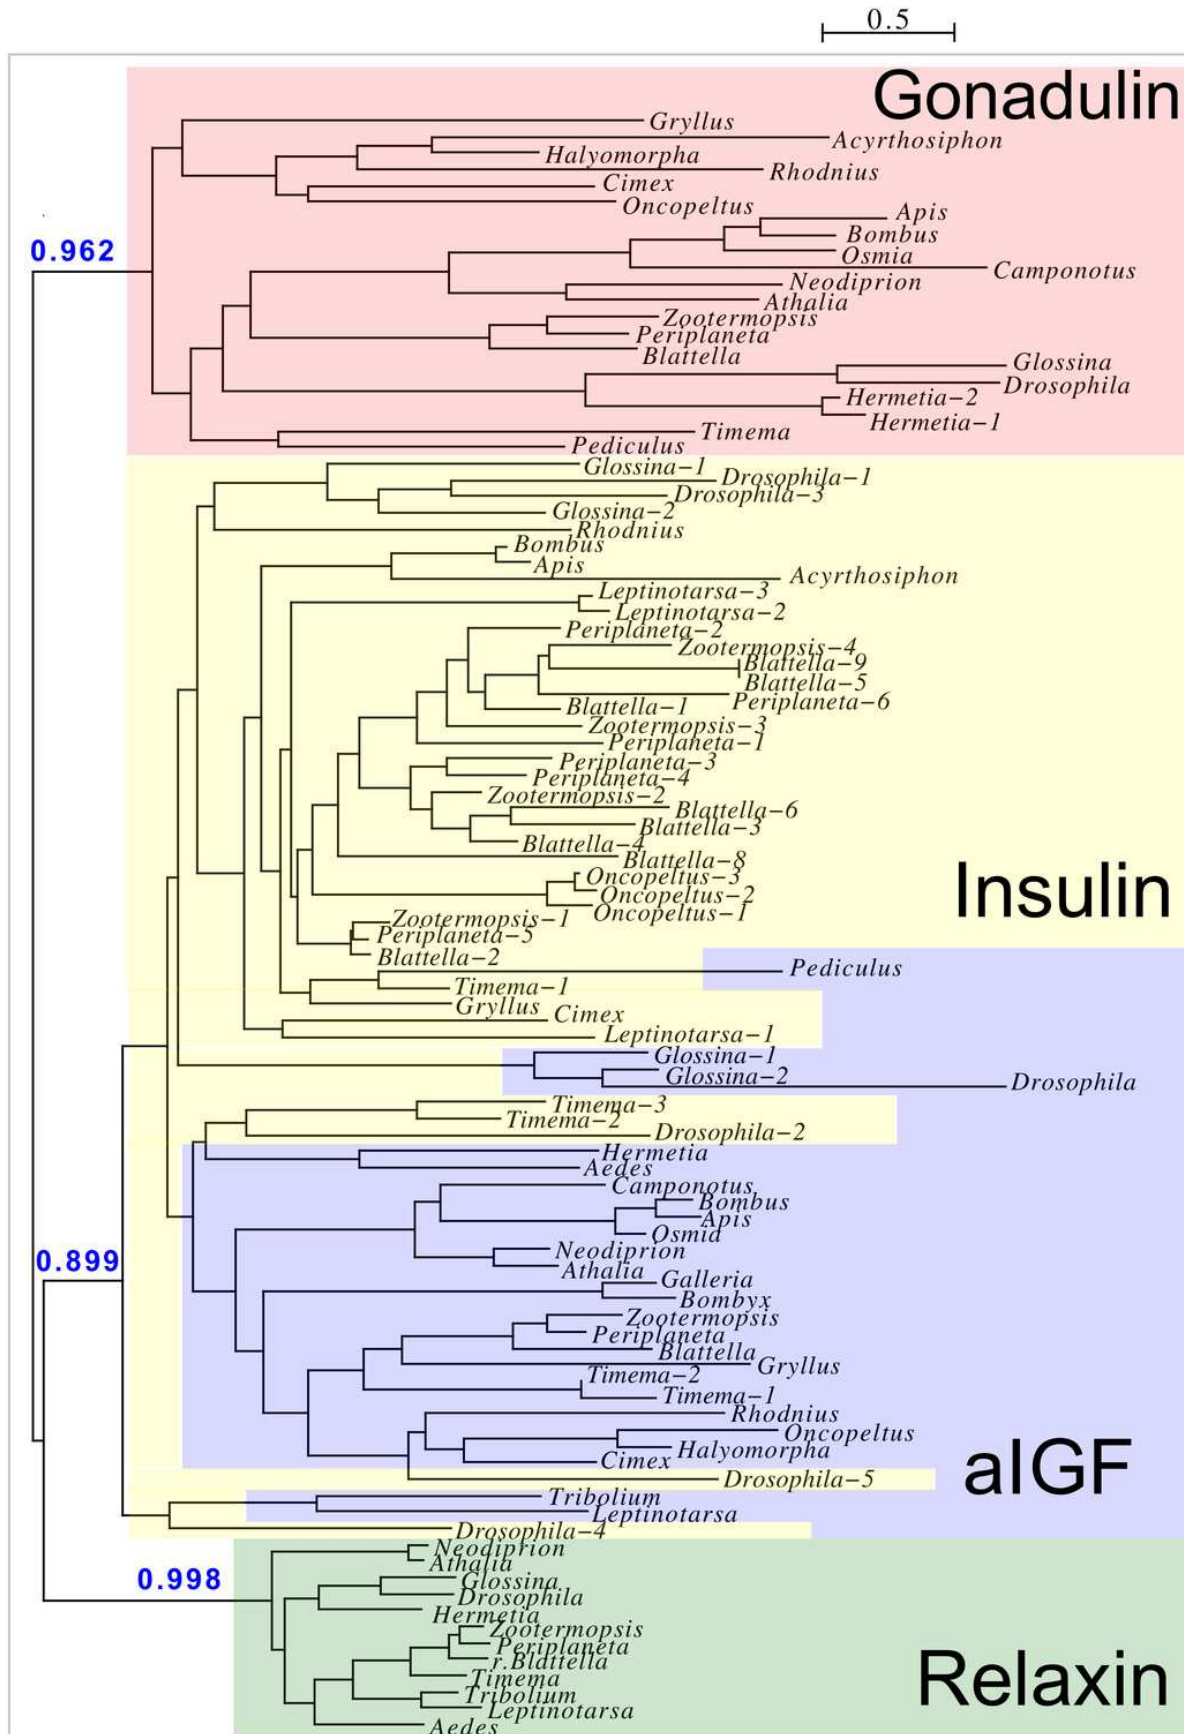

## Figure 3

Radial arthropod ilp sequence similarity tree.

Note that the gonadulins cluster and are well separated from the other arthropod ilps. A more detailed sequence similarity tree with species names is present in the supplementary data as Fig. S1; sequences are from Suppl. Spreadsheet 1.

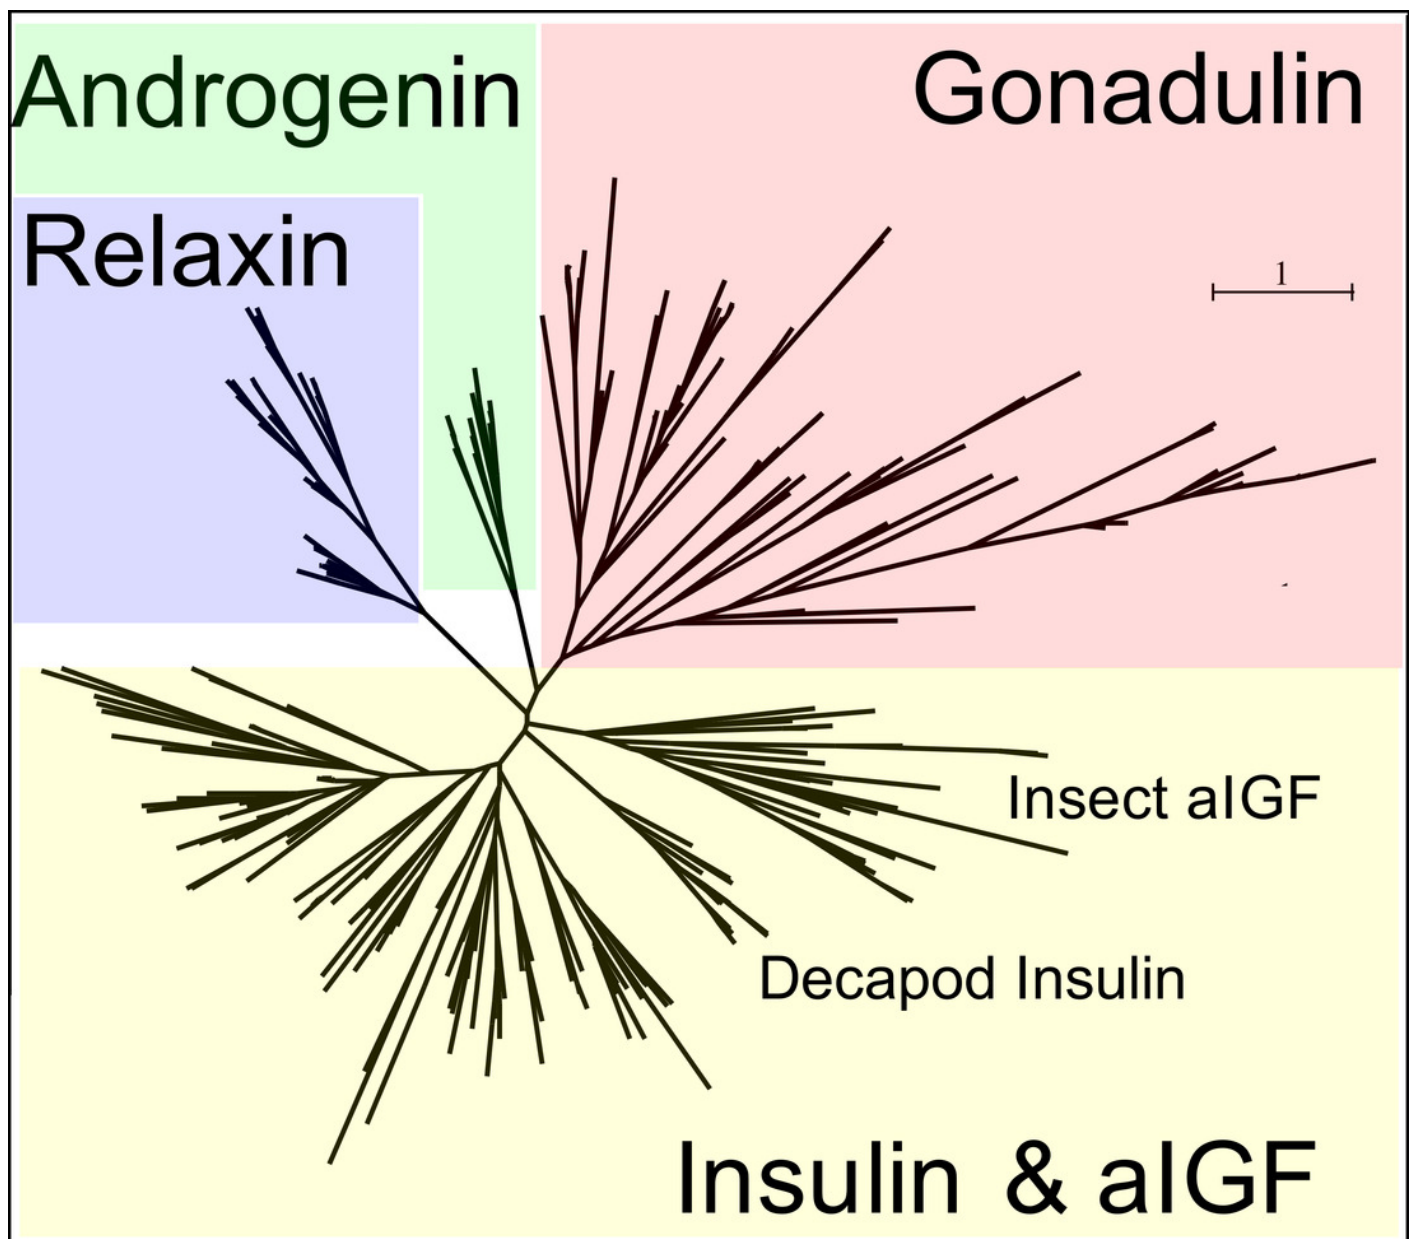

## Figure 4

aIGF sequence alignment.

Sequence alignment of some insect aIGF propeptides; where applicable only the isoforms with the arginine-rich sequences are shown. Note that these proteins have three different regions with sequence similarity: the insulin subsequence, the arginine-rich sequence containing an additional disulfide bridge and the C-terminal parts (underlined in blue), that is also somewhat conserved in *Gryllus rubens*, even though that species lacks an arginine-rich subsequence. Sequences are from Suppl. Spreadsheet 1. Cysteine residues are indicated in red and the predicted disulfide bridges by lines. Other conserved amino acid residues are highlighted in black and conserved substitutions in grey.

```
Drosophila -SPLAPTEYEQRMM C STGLSDVIQKICVSGTVALGDVFPNSF-----GKRRKR
Tribolium -----NIDRKEFFCGKKLVKTLTELCAIYNYP-----TLPRRR
Bombyx -----ATKASVKECGRHLSEIMSRVCHAYNGPAWDVPTVEQ-----P-----GGLLRK
Bombus -----TPYKRSLRLCSKSLSDALYLACKDRGYNEPFSYSSEED-----SPMDS
Gryllus APLPAPVAASGLTRACGSQADLLAAVCHGRGYNDPQAAAAAAAAAAPASPSAWVPAAAVAPAGT
Cimex -----VRF CGRSLAEALAIVC SERGYNMAERPGA-----PIPTDRR
Timema -----RRS C GSQADILSLV C AGRGYNTPYAFNGEQTE-----PS-----TPSKSHR
Blattella -----APTIRMQMC GSQALANTLAQIC SAYGYHDPFSQTRRVNS-----PSSG-----VNTTPNRLR

Drosophila DLQNVTDL CCKSGGCTYRELLQY-CKG-----
Tribolium FRRQIVDECC-RSQCRRRYLVQYYCMEAHSSIAHLLKAKPEPEKPP-----ERPVEAPKETP
Bombyx RQLGIADECC-LMCTWEQLSEY-CSIIAYSESPLED-----LESHVIADRSAEQENLAAGAKTTT
Bombus VGPGLAEECC-YHTCTYTQLQOY-CKPEKSSVDAVNSPVWIEKYPYLSTRSATSSSLEER-----
Gryllus ARAGVADLCC-RRGCSLRTLQOY-CSPADPRSS-GPGAAAAAS--AAPAASGSAPAAAAAA
Cimex YRRGIVDECC-HNGCSFSTLESY-CSEGSDDSK--SPPYLQISK--RSDSHKNMNKENK--D
Timema VSRGITHECC-KVGC SWKTMEEY-CLPGEAENKI--FD-----V--ESLINOIQ----
Blattella VRRGVADECC-KTGC TLDTMEQY- CSAPLTPAQR--ARF-LQOYQ----SNALNRILQEVF----

Drosophila -----
Tribolium V-----GTPPSH-
Bombyx TTTTP-----AV-----VGSDE-----HVHV-----RGETGLA
Bombus -----SRSDIDVHGHTIK-----CKIHGSKGARRKGANMDRDDA GGC DR-K
Gryllus AGNDPAHSPPVRAMSEKRP-----GSGAAGSP
Cimex YVDDQEMSDQYSDMMVKQSTTYQHNVLQTRSSIENIDIKSDGTHHKRKL-FGHIDDDQGRAGHI
Timema --TDD-----SSKVSPEKKNYSR-----SSSKA
Blattella --SGSSLN-A-GSKISKDPK-----NDLSS

Drosophila -----
Tribolium -----ISPNGHCKCRKRRRAKRINKSKRMQQR-----NFIHNPVPP
Bombyx -----SSHGYGRARGRRCWCRKRKRRSGRRRASLA-----
Bombus -----NPLRRHRAGHCGCRHRRQRRRRLGKMLERTSGVKSGAP-----LKK-----
Gryllus SPSSPAPPAPP-----TSLA-----SFRVGVVRSYFND FVLPP--
Cimex YPYSLDHHLRKYKATGKNKVRNEMRRSSMDSSHQRLESKLGHNPNENSLDWLRKSEND FISSNRHP
Timema ---KGHRKKKKKGRKGNRCRRRKRKQKFDPEKIEQ-----
Blattella ---KVRROQDKKGQRGNRCRRRRRRRGKGDSEEIER-----

Drosophila -----
Tribolium -----ANIGHVERSQTFYIWKFSRVY-----
Bombyx -----IKNAVRAAPVGTVSP LITWGRTLNTDLPRPDNDRYAYVVT--
Bombus -----EVETETKATTREAPF-----
Gryllus -----GAAA-----APAPAPAPTAGV-----
Cimex TIRHHKERFSVPRHRVTDLHVKKNKVSP TSQVGTISP YFLG-HTLVSK--STRKSFYR--
Timema -----MLKDAPVIEIGTVPPPYLG-QPVILP--RVKEVLHHI
Blattella -----Q-QNHIAPVIGTINPSYFG-VPVFLS--PRLKKQETQODRHRK
```

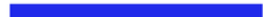

## Figure 5

Intron-exon structures of aIGF genes.

(A) *Bombyx mori*, (B) *Tribolium castaneum*, (C) *Apis mellifera*, (D) *Blattella germanica*. In the top part for each species the gene structure with the exon represented as small colored boxes and the introns as a black line. The orange brown color in the first exon corresponds to the coding sequence of the signal peptide and the blue corresponds to the insulin sequence, while the red color corresponds to the coding sequence of the arginine-rich region that is alternatively spliced in the two isoforms produced from these genes. The yellow exons contains coding sequence for the GTVX<sub>1</sub>PX<sub>2</sub>(F/Y) consensus sequence. The amino acid sequence coded by this alternatively spliced DNA sequence is indicated. The numbers 1 and 2 show the coding sequences of the two mRNA species produced from these gene using the same colors as for the gene structures. Note that the structures of these genes are very similar, with the major differences being the size of the introns, some of which are very large, as indicated by interruption sign in the gene structures, and the loss of an intron in *Apis*. The only other notable difference is that in the honey bee the second transcript is produced in a different fashion and only consists of one coding exon. The alternative splice site in this species have been indicated together with how this results in either splicing or the inclusion of a stop codon in the mRNA.



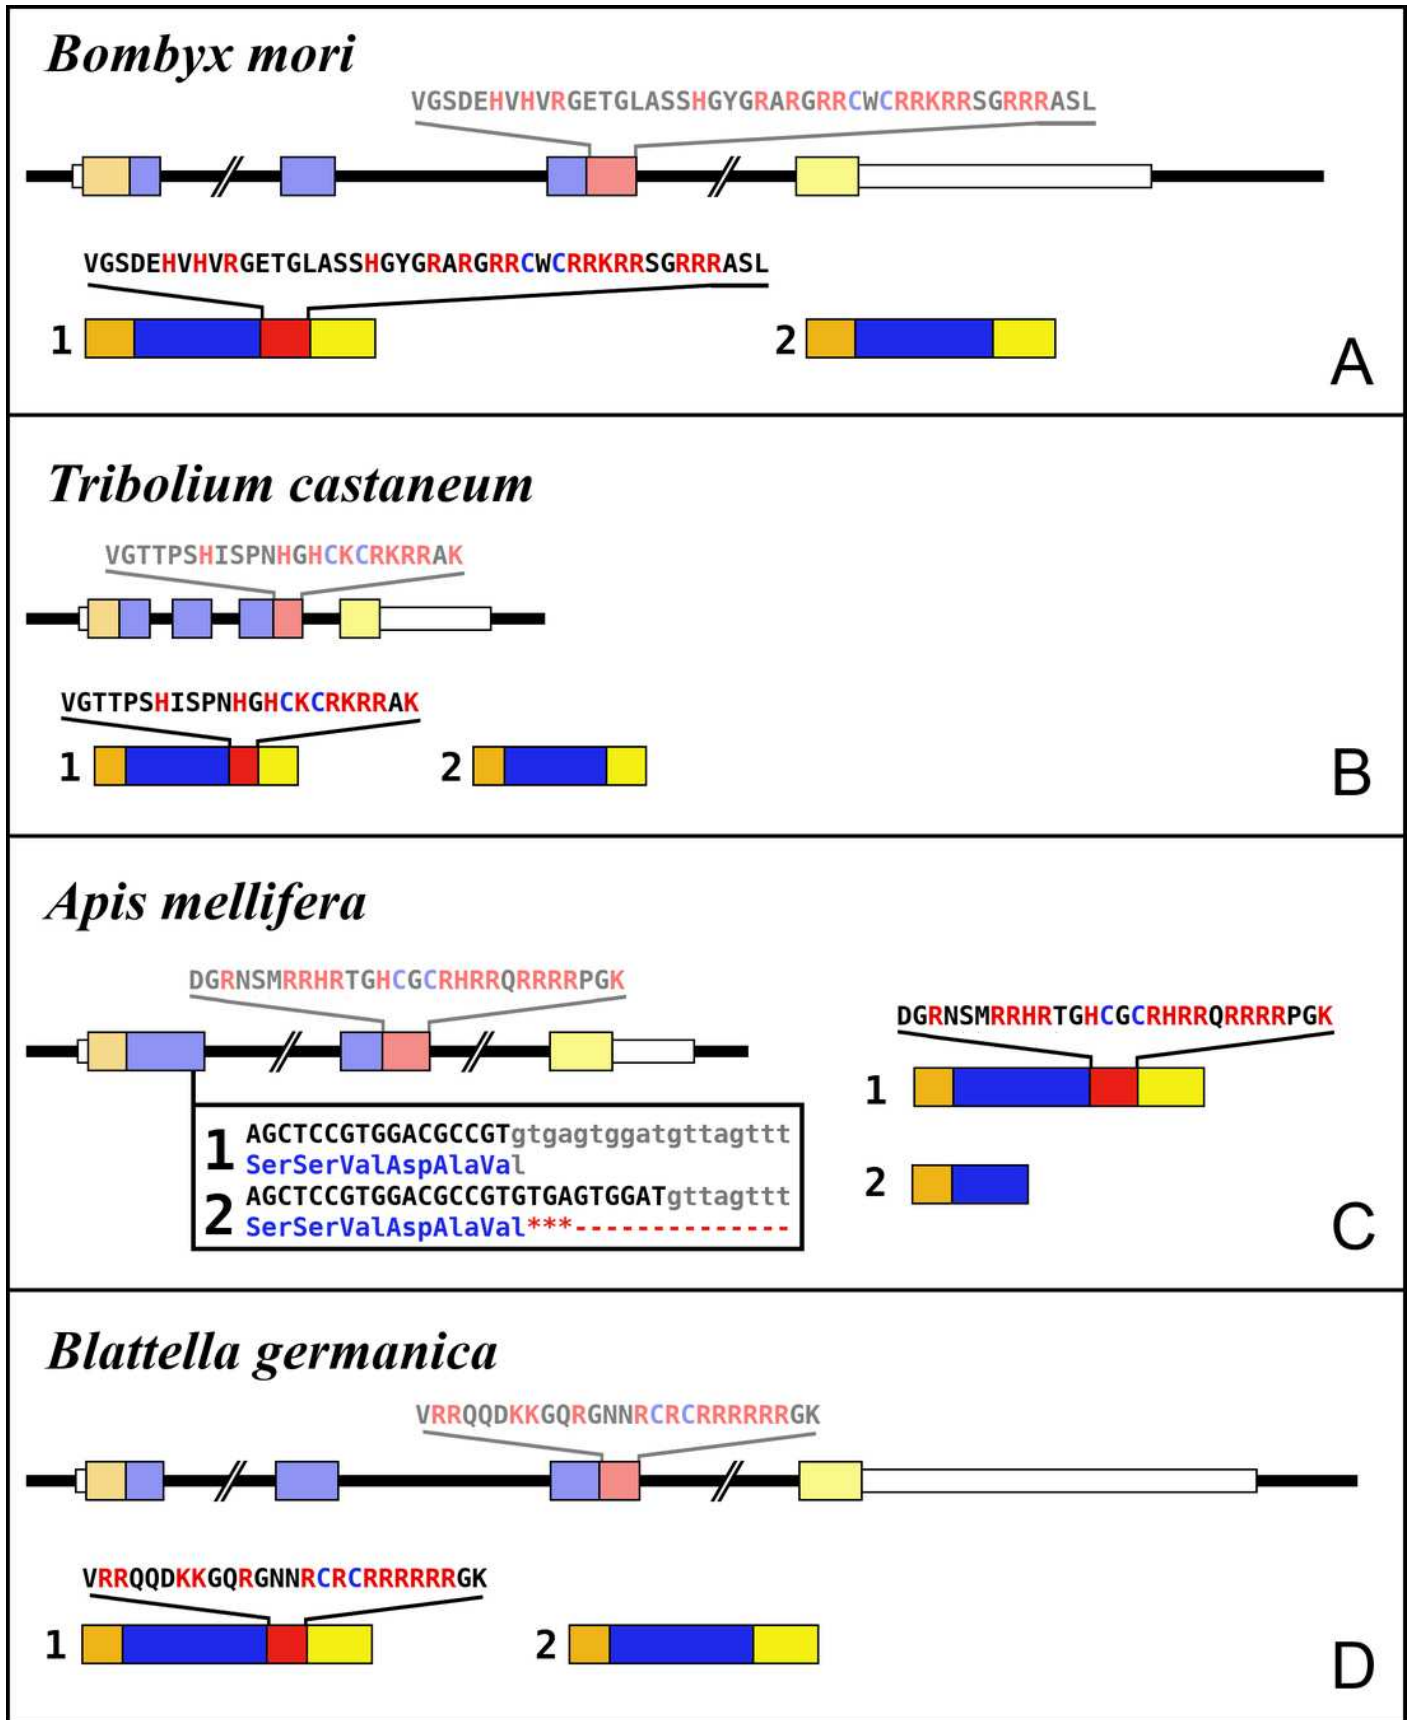

## Figure 6

Expression of aIGF and BIGFLP during development in *Bombyx mori*.

Number of reads per million present in SRAs of a single series of experiments where there are three experiments for each developmental stage. The three values corresponds to the maximum, minimum and average of those three. Scale to the left is for aIGF, scale to the right for BIGFLP; note that the number of BIGFLP reads is much larger than those for aIGF.

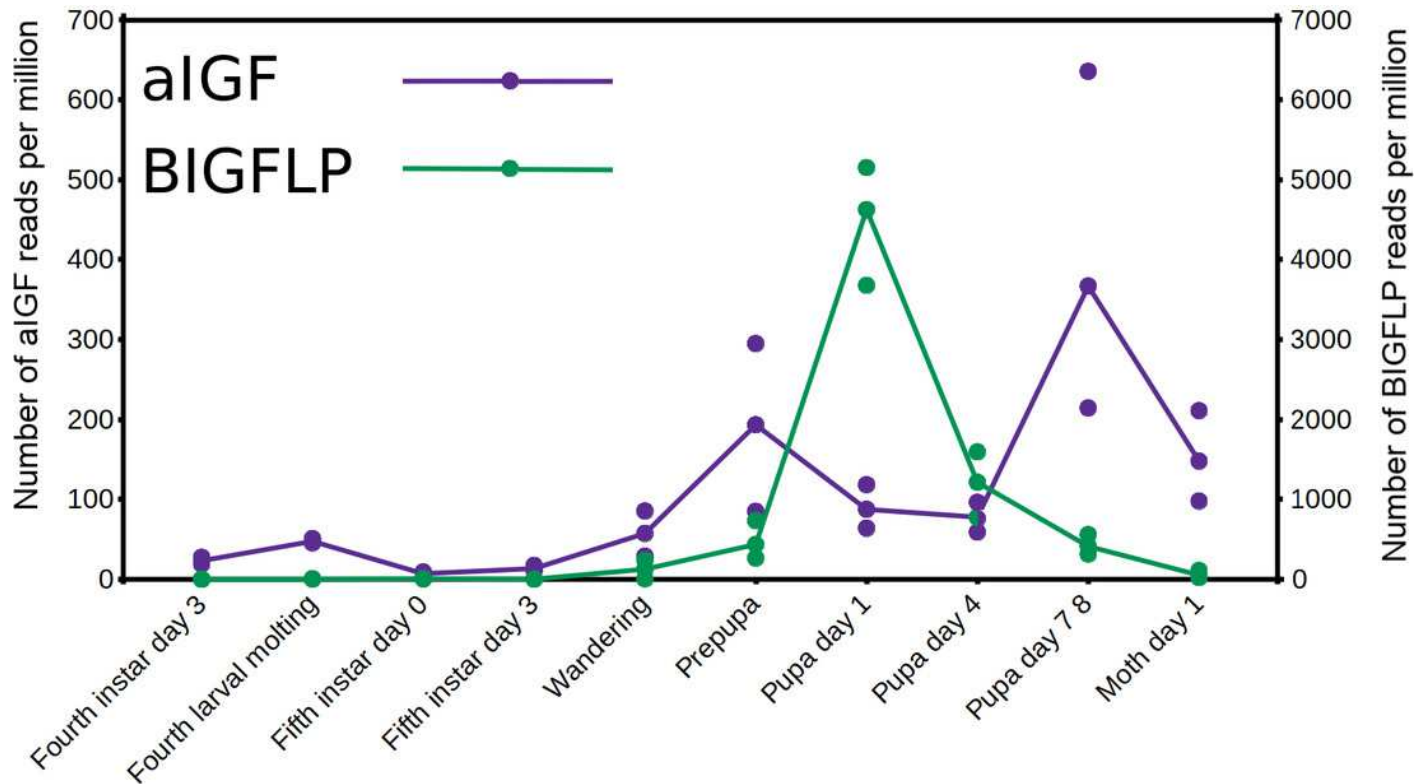

## Figure 7

Differential expression of *Bombyx* aIGF alternative splice forms.

Counts of reads specific for the long isoform of aIGF were plotted against the total number of aIGF reads in all *Bombyx* SRAs (n=253). Samples with high total aIGF counts show different levels of expression of the long isoform. Identification of some of the salient samples in this figure is provided in Fig. S5.

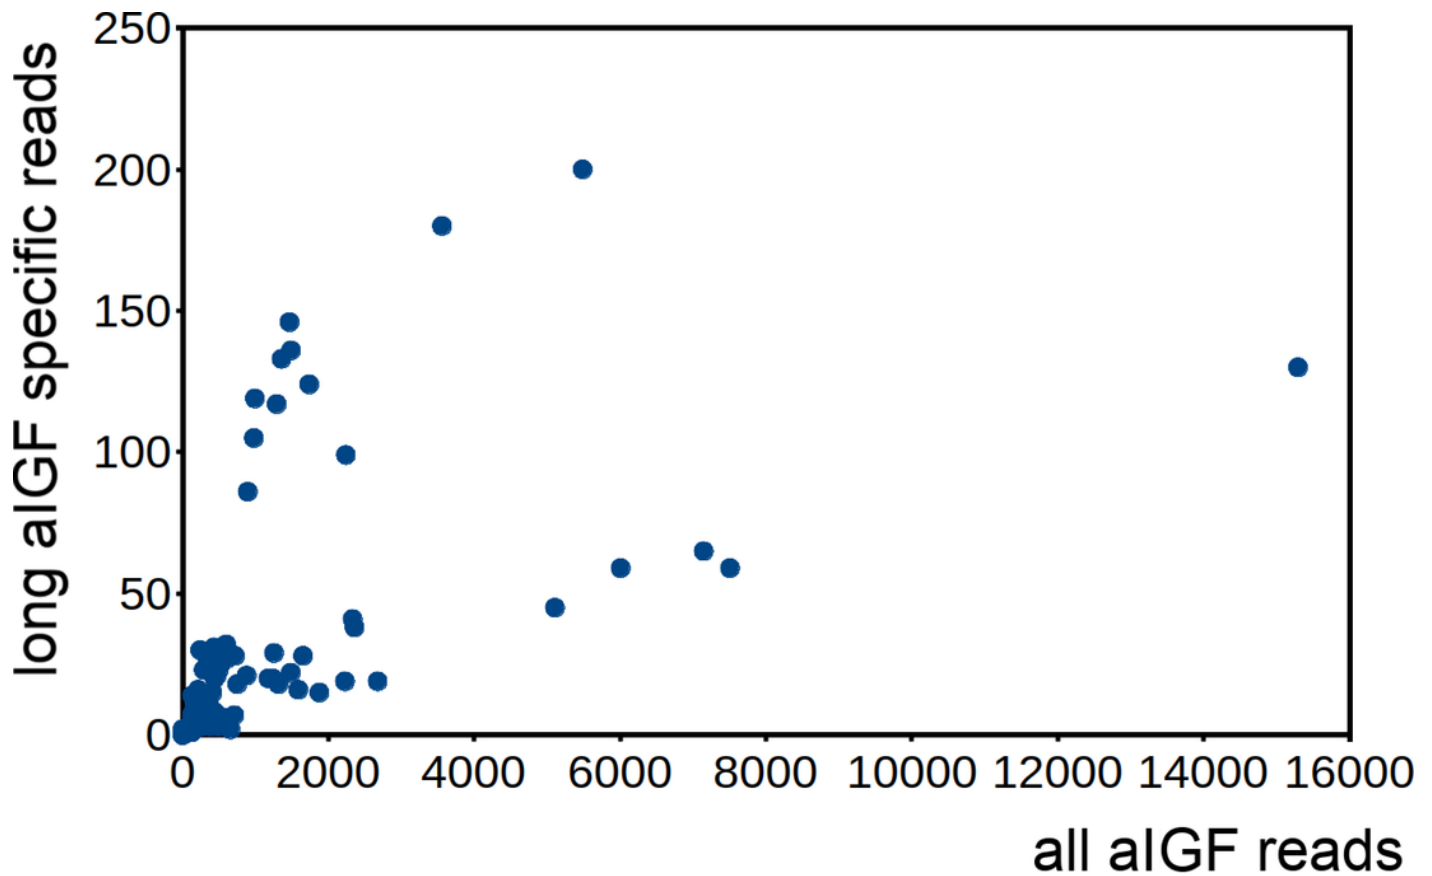

## Figure 8

### Evolution of the insect aIGF gene.

Schematic organization of insect aIGF genes in relation to their place on a simplified phylogenetic tree. The archetype of the insect aIGF gene consists of four coding exons. The first codes for the signal peptide (orange brown color) and the B-chain and part of the C-peptide, the second codes for the remainder of the C-peptide and the A-chain. The third coding exon codes for the first part of the C-terminal extension and has in the middle an alternative splice site allowing alternative splicing of the arginine rich sequene (in red). The last coding exon (yellow) codes for final part of the C-terminal extension that contains the  $GTVX_1PX_2(F/Y)$  consensus sequence. Diptera have lost the third coding exon and the *Eremoneura* have also lost the fourth coding exon. Sequence comparison of the aLGF precursors from *Dasypogon*, *Hermetia*, *Condylostylus* and *Platypeza* are very similar, except for the loss of the last part (Fig. S6). The structures of the *Blattella*, *Apis*, *Tribolium* and *Bombyx* genes are from Fig. 5 and those of the *Oncopeltus* and *Aedes* genes from Fig. S3. The *Timema*, *Hermetia*, *Dasypogon*, *Ceratitis*, *Drosophila* and *Glossina* genes were produced in the same fashion. The *Condylostylus* gene could only partially constructed from genome and transcriptome SRAs. The *Platypeza* gene has been made translucent, as is only inferred; it is on a transcript (GCGU01007956.1) and assumes that its structure is identical to those of its closest relatives.

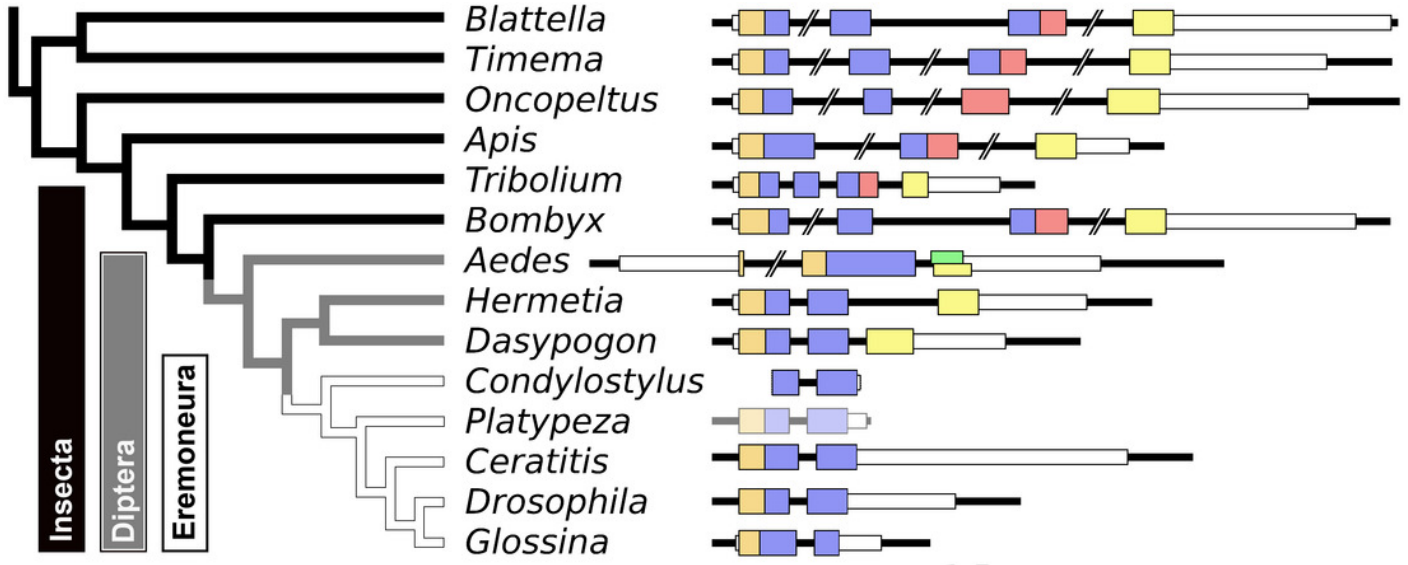

## Figure 9

Arthropod relaxin sequence alignment.

Note how the relaxin propeptides are much better conserved than either the gonadulins or the aIGFs. Also note that the exception is the single decapod relaxin that has also an additional cysteine residue. This is not a sequencing or other technical error, as the same residue is also found in several other decapods from different decapod orders (Fig. S7). Cysteine residues are highlighted in red, other conserved amino acid residues in black and conservative substitutions in grey. Sequences are provided in Suppl. Spreadsheet 1 and from Veenstra (2020).

Drosophila -----LQHTEEGLEMLFRERSQSDWENVWHQETHSR**CRDK**-LVRQLYWA**CEKD**  
Anopheles -----SGLDDALEVTFSETRADWEKVWHQESH**SR**REK-LIRHLYWA**CEKD**  
Athalia -----TDHLVNLERVFKEKRSRADWENAWHRETHAR**CR**ET-LLRHLYWA**CEKD**  
Timema -----IVTDQDLEERFKRSDAEWENVWHNERHTRCRAN-LLKHLYWA**CEKD**  
Blattella -----TNSEQELEEMFKARSDNEWENVWHQERHTR**CR**EM-LLRHLYWA**CEKD**  
Leptinotarsa -----MRSENDLELVFKERTHSDWRNAWHQEKHSR**CR**GD-LVKHLFWA**CEKD**  
Nephrops -----LEPDLIRQIGSRTESEWEVLWNKERLAL**CR**TR-LRHNL**EAI**CVKD  
Mesobuthus-1 -----F-P-LTE**EEEELE**RENEEWKRNWHTE**RYRI**CEYDKIATFVKLA**CKND**  
Mesobuthus-2 -----TEI-PQEYKTEIF**EARK**PDEWKNYWHIE**EKYKR**CYYQ-IPNHVELA**CKYD**  
Parasteatoda -----EIDVDPTWEN**VEFKSR**NDEEDWKS**VWHTER**HRR**CYHD**-LLVHMDWV**CQKD**  
Tetranychus LSPFP**TIISL**STSPNDLTTW**ENIEQDR**SDD**EWRAL**WHT**ERHRR**CY**QE**-L**ESHMKWV****CNKD**

Drosophila IYRL**TRRN**KKRTGNDE---AWIKK-----TTTEPD  
Anopheles IYRISRRSGDGNGNAG---MVEKR-----TSMVDE  
Athalia IYGV**SRRS**VNF**SK**-----  
Timema IYRL**SRR**NDQHS-----  
Blattella IYRL**SRR**NGFQDLQL-----LD  
Leptinotarsa IYRL**TRR**SDPRYKSYD-----DYDND  
Nephrops VYR**SLT**SPNH**HHIKR**STDI**CL**KVHDS**DGEGDIR**DKGAVSVNLPTATIEITPSSPDTGQH  
Mesobuthus-1 IYKINNEE---LQ**NQNT**-----  
Mesobuthus-2 IYKVPVDKREESSK**PIL**-----  
Parasteatoda IYAV**KR**DKRDTEPFID-----  
Tetranychus IYK**VK**KS**DSEI**ETVSS-----PHREPRGI

Drosophila GS----TWL-HVNY**ANMFL**----RSRRS--DGN---TP**SISNE****CC**-TKAG**CTWEEYAEYC**  
Anopheles GPLV**YP**W**AIDRE**VAY**AF**L---RTRRTG**KRRS**---GGS**ITAE****CC**-TRTG**CTWEEYAEYC**  
Athalia --PPPP**PWV**SGW-**RAKEM**L---RYRRDL**RRRS**PA**AVA**S**ITQE****CC**-GGPG**CTWEEYAEYC**  
Timema --HVG**SPF**VSVV-**EARVFL**----RSRRDR**KRRS**A**A**-GGS**ITDE****CC**QAS**GGCTWEEYAEYC**  
Blattella KYN**PKY**P**FLSVV**-**EARVFL**----RNR**RRRRRS**-**A**-**EPSITDE****CC**HNS**AGCTWEEYAEYC**  
Leptinotarsa DIEV**DF**P**WKS**PR-**RAKRIL**---R**FRRS**ID**RRS**---GS**ITNE****CC**-KSTG**CTWEEYAEYC**  
Nephrops NIY**TRS**P**FLSVQ**-**QANLFV**TT**WVGG**RRGGHY**RRRR**Q**SSITAE****CC**-TTVG**CTWEEYAEYC**  
Mesobuthus-1 ----FNN**FVKK**D**KYL**PIS**LAYS**FG**IKK**-TNP**ILKRR**KRG**ITQE****CC**ENTAG**CYWEELAEYC**  
Mesobuthus-2 ----FKR**FQ**K**PDEYL**PIY**L**I**HGF**GT**KKRN**G-**RKRR**GT**GGIVQE****CC**EKS**NGCSWEEYAEYC**  
Parasteatoda ----EMQ--**AHQ**FLGR**HRKR**SG**AH**HAL**VKRG**I**IDE****CC**HGN**AGCSWEEYAEYC**  
Tetranychus FEGRHY**DAFISKE**---**RA**L**NLLG**----**QTATSVRR**KRG**IDE****CC**H**GANGCSWEEYAEYC**

Drosophila PS**NKR**R**NHY**-----  
Anopheles PS**NKR**L**NQY**RRR**K**-----  
Athalia P**ANKR**V**DKR**TRLS**ADE**P**M**L  
Timema P**ANKR**L**RK**FL-----  
Blattella P**ANKR**L**RK**FV-----  
Leptinotarsa P**TNK**R**YTS**YV-----  
Nephrops P**TSSR**L**R**PGV**TPI**-----  
Mesobuthus-1 P**NNI**R**RVN**NR**NML**V**QN**----  
Mesobuthus-2 P**GHN**RR**RG**SL**IAEN**----  
Parasteatoda P**ANSR**L**R**A-----  
Tetranychus T**HNNR**I**R**A-----

## Figure 10

Synteny of arthropod ilp genes.

Schematic representation of relaxin, gonadulin and aIGF genes in three insect and two spider species. Genbank accession numbers are indicated below the species name. Arrowheads indicate the direction of transcription. The numbers in Kbp indicate the distances between the coding regions of neighboring genes.

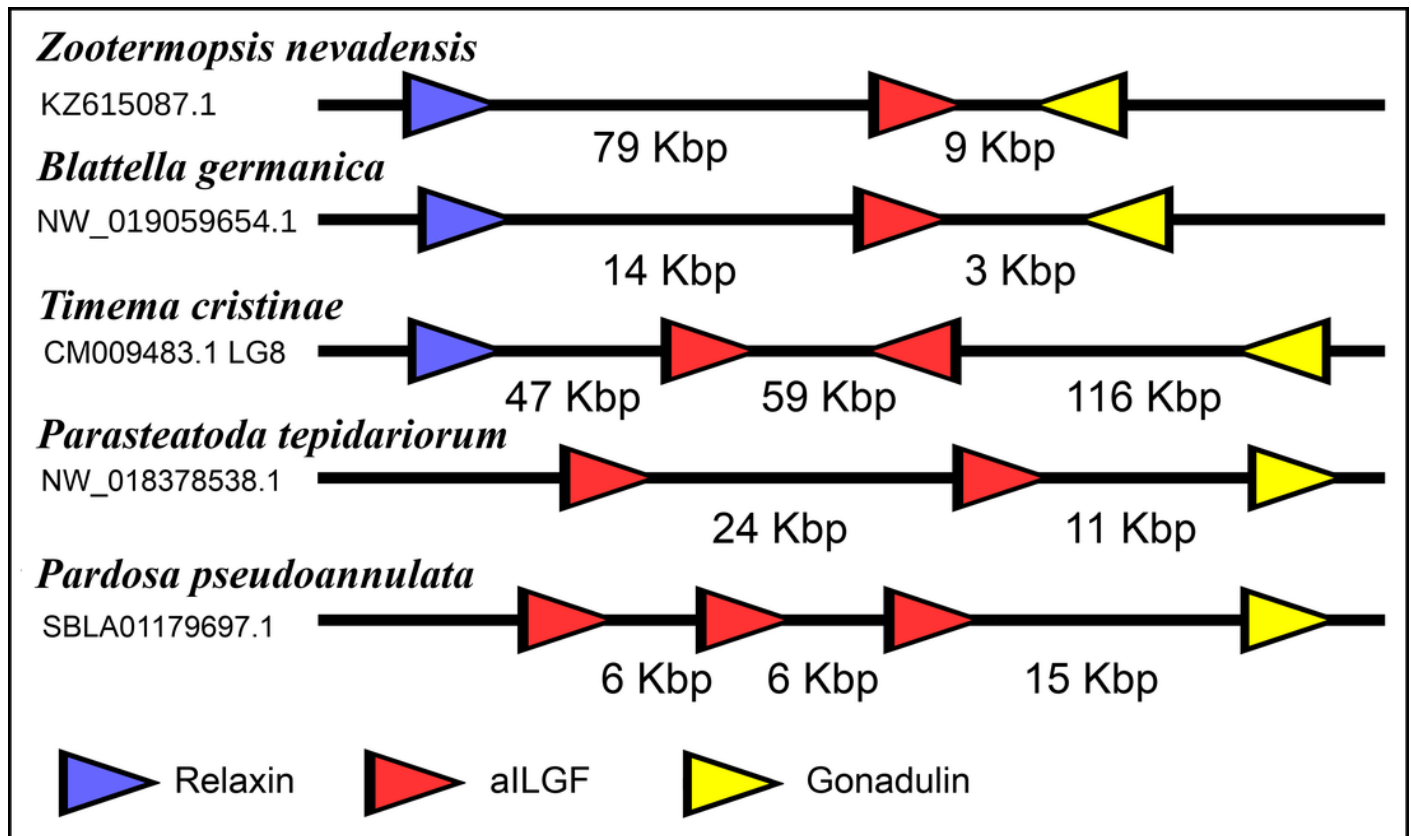



# Figure 11

Phylogenetic tree of arthropod insulin RTKs.

Phylogenetic tree of various arthropod RTKs. Note that the decapods, chelicerates and insect RTKs evolved independently. Only branch probabilities of more than 0.900 have been indicated. Sequences are from (Veenstra, 2020) and others provided in Supp. Spreadsheet 1.

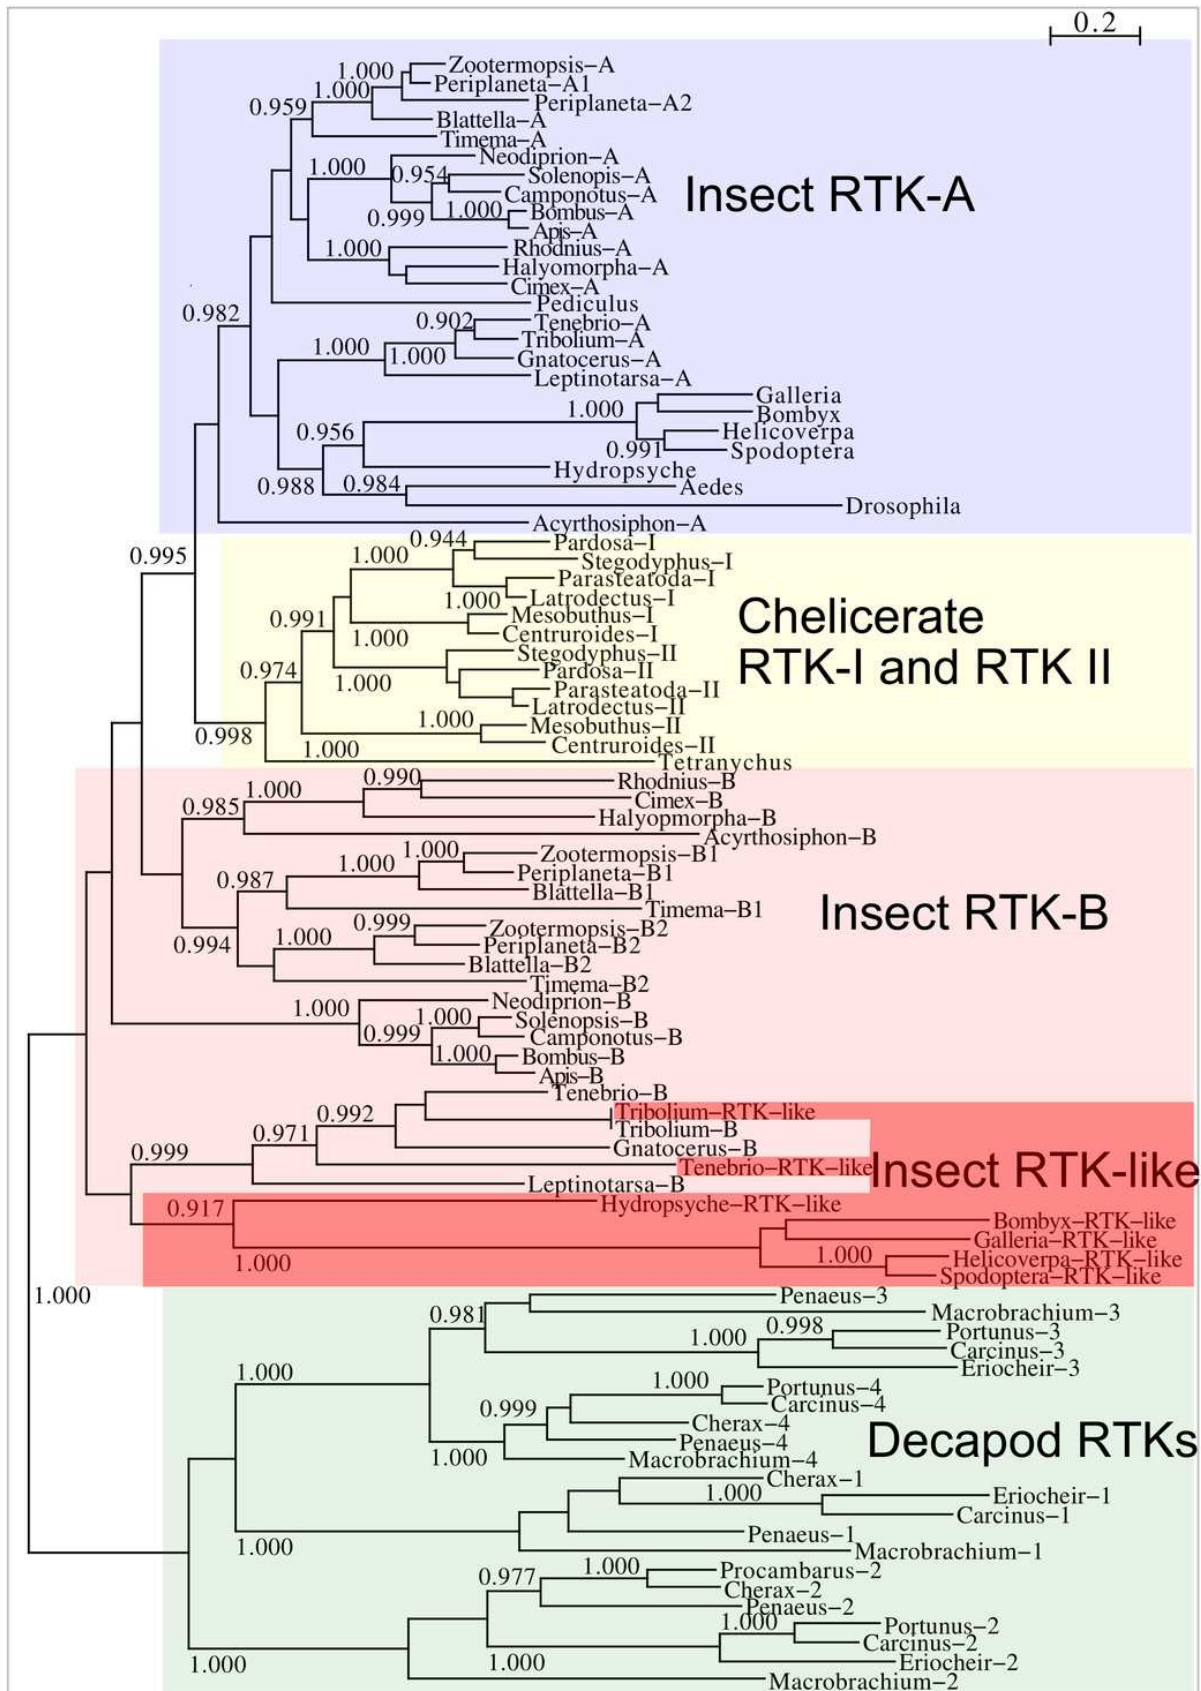

## Figure 12

Phylogenetic tree of putative arthropod insulin GPCRs.

Phylogenetic tree based exclusively on the transmembrane regions of various decapod LGRs that might function as receptors for insulin-related peptides. Only branch probabilities of more than 0.900 have been indicated. Sequences are from (Veenstra, 2020) and others provided in Supp. Spreadsheet 1.

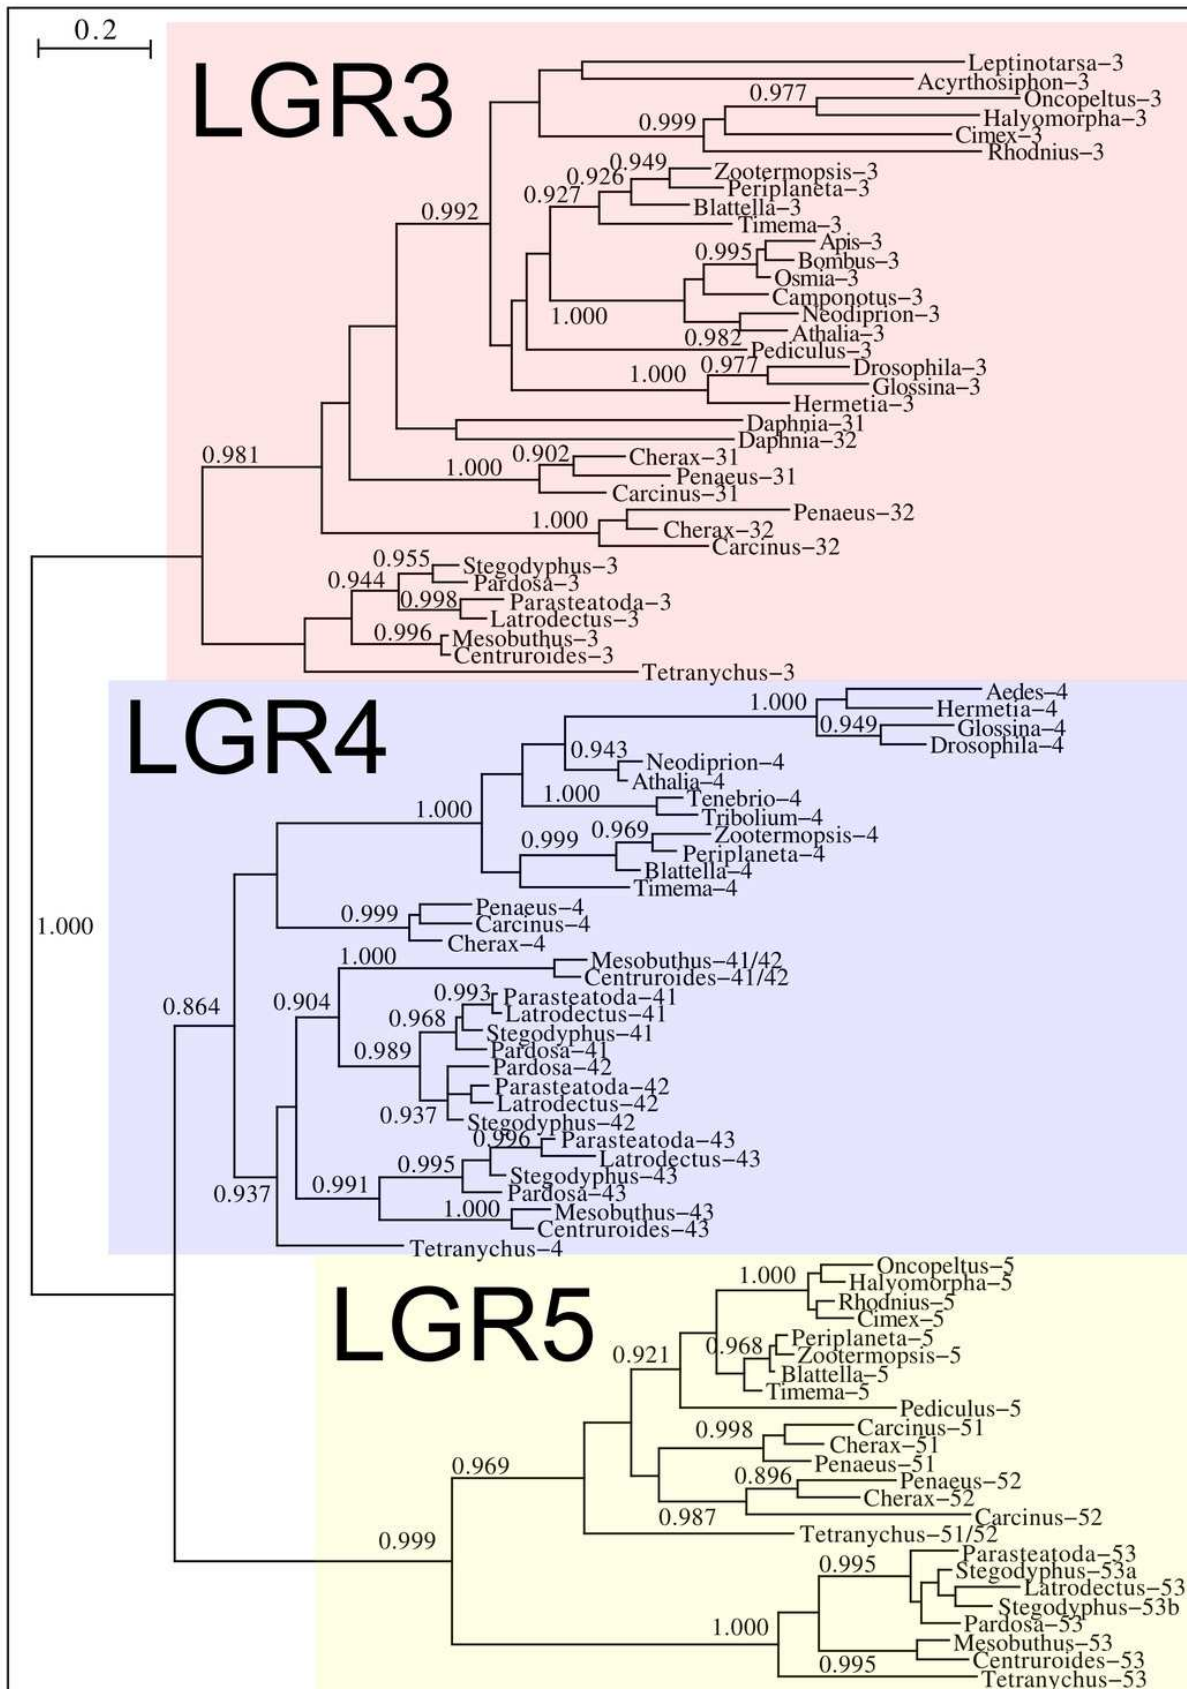

## **Table 1** (on next page)

Gonadulin expression.

Numbers are the number of gonadulin half reads per million in one or more transcriptome SRAs. This is a selection of the data from Suppl. Spreadsheet 2.

## Table1. Gonadulin expression.

| Species                          | Gonadulin | Tissue/organ                               |
|----------------------------------|-----------|--------------------------------------------|
| <i>Blattella germanica</i>       | 0.00      | Male heads                                 |
|                                  | 7.30      | Female gonads and fat body                 |
|                                  | 4.10      | Male gonads and fat body                   |
|                                  | 493.70    | Non-fecundated eggs                        |
| <i>Timema cristinae</i>          | 0.00      | Head                                       |
|                                  | 23.30     | Testis                                     |
|                                  | 46.90     | Ovary                                      |
| <i>Rhodnius prolixus</i>         | 78.40     | Ovary                                      |
|                                  | 1.40      | Testis                                     |
|                                  | 0.20      | CNS                                        |
|                                  | 3.00      | Antenna                                    |
| <i>Apis mellifera</i>            | 0.20      | Ovary of virgin queen                      |
|                                  | 61.60     | Ovary of normal egg-laying queen           |
|                                  | 96.70     | Ovary of normal egg-laying inhibited queen |
|                                  | 59.00     | Ovary of normal egg-laying recovered queen |
|                                  | 7.10      | Antenna                                    |
|                                  | 4.10      | Second thoracic ganglion                   |
| <i>Steatoda grossa</i>           | 0.00      | Cephalothorax                              |
|                                  | 7.10      | Ovary with eggs                            |
|                                  | 5.90      | Minor ampullate silk glands                |
|                                  | 3.30      | Tubuliform silk glands                     |
| <i>Parasteatoda tepidariorum</i> | 2.00      | Ovary from SRR1824489                      |
|                                  | 0.00      | Ovary from SRR8755633                      |
|                                  | 0.00      | Ovary from SRR8755634                      |

Numbers are the number of gonadulin half reads per million in one or more transcriptome SRAs. This is a selection of the data from Suppl. Spreadsheet 2.
